# Supplementary material for: Metabolome and transcriptome integration reveals insights into petals coloration mechanism of three species in Sect. Chrysantha chang
Source: PeerJ. 2024 Apr 19;12:e17275. doi: 10.7717/peerj.17275 (PMC11034495; doi:10.7717/peerj.17275)
Supplement: Supplemental Information 2 [file peerj-12-17275-s002.xlsx]

## Sheet: Sheet1
Table S1. MIQE checklist for qRT-PCR.
Item to check	Importance	Checklist	Item to check	Importance	Checklist
Experimental design			qPCR oligonucleotides
Definition of experimental and control groups	E	CZ, ZD and XB	Primer sequences	E	please see Table S9
Number within each group	E	3	RTPrimerDB Identification Number	D
Assay carried out by core lab or investigator's laboratory?	D		Probe sequences	Dd
Acknowledgement of authors' contributions	D		Location and identity of any modifications	E	no
Sample			Manufacturer of oligonucleotides	D
Description	E	petals at full-bloom stage of three species in Sect. Chrysantha Chang	Purification method	D
Volume/mass of sample processed	D	3g for each repetition	qPCR protocol
Microdissection or macrodissection	E	macro	Complete reaction conditions	E	20μl
Processing procedure	E	collected petals at full-bloom stage, immediately frozen in liquid nitrogen and stored at -80℃	Reaction volume and amount of cDNA/DNA	E	2μl cDNA
If frozen, how and how quickly?	E	immediately frozen in liquid nitrogen	Primer, (probe), Mg2+ and dNTP concentrations	E	primer 0.8μl; 2x universal SYBR qPCR mix 10 μl
If fixed, with what and how quickly?	E	no	Polymerase identity and concentration	E	2x universal SYBR qPCR mix 10 μl
Sample storage conditions and duration (especially for FFPEb samples)	E	-80℃ (< 6 months)	Buffer/kit identity and manufacturer	E	Biosharp
Nucleic acid extraction			Exact chemical constitution of the buffer	D
Procedure and/or instrumentation	E	following the manufacturers guide	Additives (SYBR Green I, DMSO, and so forth)	E	SYBR Green I
Name of kit and details of any modifications	E	RNA prep Pure Kit DP432	Manufacturer of plates/tubes and catalog number	D
Source of additional reagents used	D		Complete thermocycling parameters	E	95℃ 2min; [95℃ 15s] 40; [60℃ 20s]40
Details of DNase or RNAse treatment	E	DNase	Reaction setup (manual/robotic)	D
Contamination assessment (DNA or RNA)	E	RNA	Manufacturer of qPCR instrument	E	Roche
Nucleic acid quantification	E	good	qPCR validation
Instrument and method	E	nucleic acid protein concentration analyzer Aurora-800	Evidence of optimisation (from gradients)	D
Purity (A260/A280)	D	1.9	Specificity (gel, sequence, melt, or digest)	E	melt 80-85℃
Yield	D		For SYBR Green I, Cq of the NTC	E	Ct: 0
RNA integrity: method/instrument	E	agarose gel electrophoresis	Standard curves with slope and y intercept	E	slope: 3.3
RIN/RQI or Cq of 3' and 5' transcripts	E	RQI 10	PCR efficiency calculated from slope	E	0.99
Electrophoresis traces	D		Cls for PCR efficiency or SE	D
Inhibition testing (Cq dilutions, spike, or other)	E	10-fold dilution	r2 of calibration curve	E	0.99
Reverse transcription			Linear dynamic range	E	Ct (14.89-21.18-27.89)
Complete reaction conditions	E	20μl	Cq variation at lOD	E	14.89
Amount of RNA and reaction volume	E	1μg	Cls throughout range	D
Priming oligonucleotide (if using GSP) and concentration	E	Rondom Primer (0.1μg/ul); 1μl	Evidence for lOD	E	3
Reverse transcriptase and concentration	E	TUREscript Hˉ RTase; 1μl	If multiplex, efficiency and LOD of each assay	E	no multiplex
Temperature and time	E	25℃ 10min; 42℃ 50min; 65℃ 15min	Data analysis
Manufacturer of reagents and catalogue numbers	D		qPCR analysis program (source, version)	E	LinghtCycler® 96
Cqs with and without recerse trasciption	Dc		method of Cq determination	E	Abs-Quant
Storage conditions of cDNA	D		Outlier identification and disposition	E	remove
qPCR target information			Results of NTCs	E	no Ct
Gene symbol	E	CcFLS, CcDFR, CcLAR, Cc3GGT, CcCYP75B1, CcEREBP, CcHD-ZIP, CcOVM, CcEP300, CcHD-ZIP, CcMADS-box and CcTGA	Justification of number and choice of reference genes	E	GAPDH
Sequence accession number	E	prjna1003846	Description of normalisation method	E	2−ΔΔCt method
Location of amplicon	D		Number and concordance of biological replicates	D	3
Amplicon length	E	100-300bp	Number and stage (reverse transcription or qPCR) of technical replicates	E	3 technical replicates
In silico specificity screen (BLAST, and so on)	E	genebank	Repeatability (intraassay variation)	E	< 0.3
Pseudogenes, retropseudogenes, or other homologs?	D		Reproducibility (interassay variation, CV)	D
Sequence alignment	D		Power analysis	D
Secondary structure analysis of amplicon	D		Statistical methods for result significance	E	T-test
Location of each primer by exon or intron (if applicable)	E	cross-intron	Software (source, version)	E	spps,excel
What splice variants are targeted?	E	no secondary structure	Cq or raw data submission using RDML	D
a All essential information (E) must be submitted with the manuscript. Desirable information (D) should be submitted if available. If primers are from RTPrimerDB, information on qPCR target, oligonucleotides, protocols and validation is available from that source.
b FFPE, formalin-fixed, paraffin-embedded; RIN, RNA integrity number; RQI, RNA quality indicator; GSP, gene-specific priming; dNTP, deoxynucleoside triphosphate.
c Assessing the absence of DNA using a no-reverse transcription assay is essential when first extracting RNA. Once the sample has been validated as DNA-free, inclusion of a no-reverse transcription control is desirable, but no longer essential.
d Disclosure of the probe sequence is highly desirable and strongly encouraged; however, because not all vendors of commercial predesigned assay provide this information, it cannot be an essential requirement. Use of such assays is discouraged.
