# Supplementary material for: Metabolome and transcriptome integration reveals insights into petals coloration mechanism of three species in Sect. Chrysantha chang
Source: PeerJ. 2024 Apr 19;12:e17275. doi: 10.7717/peerj.17275 (PMC11034495; doi:10.7717/peerj.17275)
Supplement: Supplemental Information 3 [file peerj-12-17275-s003.xlsx]

## Sheet: Sheet1
Table S2 Primers used in qRT-PCR.
Gene name	Gene ID	Sense Primer	Anti-sense Primer
CsGAPDH		TTGGCATCGTTGAGGGTCT	CAGTGGGAACACGGAAAGC
CcFLS	TRINITY_DN22278_c3_g3	CCTTCTGCTATTGACTACCA	GACAACCACTTGAACAACTT
CcDFR	TRINITY_DN27841_c2_g1	GATGATGAGGATGAGGAAGAT	GGTCAAGATGCTGTGGTAA
	TRINITY_DN30430_c0_g1	TGGACCGATGTTGACTTC	GGATGAATGGTGACGAGAT
	TRINITY_DN22091_c0_g2	GTAATCAAGCCGACAATCAA	TTAACAGTTCCAGCAGAGG
CcLAR	TRINITY_DN22577_c0_g2	CAGCAGCAGTGAATATAATCC	CAACGGTCCTGAACGATT
Cc3GGT	TRINITY_DN22330_c0_g2	ATTCTTCGATTCGGCTCAT	CTCTGTCAACTCATACTTGTC
CcCYP75B1	TRINITY_DN28055_c2_g1	GGTGTCGTGAATGTTGGA	CTTCTCTTCCTCCTTCCTC
CcEREBP	TRINITY_DN18916_c0_g2	CCAACTCATTCTCATCATCAC	GCTGGATTCTCGGATTCTT
CcHD-ZIP	TRINITY_DN23348_c2_g2	GGAATTAGCCACAAGTCATC	GAATATCACAAGCAGGAGGA
CcOVM	TRINITY_DN23415_c2_g2	ATATAGAGGCGTAGCAAGAC	GGTAGCATAAGTTCCAAGATAG
CcEP300	TRINITY_DN28701_c2_g2	GGATATTGTAAGACGCCTAGA	GGTGTGGACATTGTTGGT
CcHD-ZIP	TRINITY_DN26775_c5_g1	GACGATGAACAAGATGAACTC	GTAATGCCACAACCAAGAAG
CcMADS-box	TRINITY_DN27016_c3_g1	CACAGCAGCAGATGAGTT	CGAGAGTAGTGATGATGGTT
CcTGA	TRINITY_DN26366_c1_g1	GCAACTGACTCTCCTGTG	GGATTGGTGAAGAAGATGAC
