# Supplementary material for: Metabolome and transcriptome integration reveals insights into petals coloration mechanism of three species in Sect. Chrysantha chang
Source: PeerJ. 2024 Apr 19;12:e17275. doi: 10.7717/peerj.17275 (PMC11034495; doi:10.7717/peerj.17275)
Supplement: Supplemental Information 4 [file peerj-12-17275-s004.xlsx]

## Sheet: Sheet1
Table S3 Raw data for hue parameters of petal colour.
	sample	L*	mean(L*)	a*	mean(a*)	b*	mean(b*)	C	mean(C)	h°	mean(h°)
Epidermis of petals	CZ1	86.62		-3.17		71.26		71.3305		92.5471
		88.21	86.9567	-7.6	-4.70667	70.06	68.85	70.471	69.0392	96.1911	93.8927
		86.04		-3.35		65.23		65.316		92.9399
	CZ2	86		-3.33		71.97		72.047		92.6491
		88.34	86.8267	-8.51	-5.05	68.29	68.2633	68.8182	68.4933	97.1033	94.2296
		86.14		-3.31		64.53		64.6148		92.9364
	CZ3	87.2		-3.69		65.55		65.6538		93.2219
		86.34	86.9967	-2.42	-3.79667	52.86	62.2733	52.9154	62.3942	92.6212	93.4189
		87.45		-5.28		68.41		68.6135		94.4134
	ZD1	86.59		-9.54		61.74		62.4727		98.7838
		88.37	86.9633	-10	-8.63	54.48	50.71	55.3902	51.4433	100.401	99.7376
		85.93		-6.35		35.91		36.4671		100.028
	ZD2	86.35		-7.03		54.62		55.0705		97.3341
		87.4	86.98	-8.15	-7.26333	50.37	47.1567	51.0251	47.7232	99.191	98.9318
		87.19		-6.61		36.48		37.074		100.27
	ZD3	86.58		-6.25		48.02		48.425		97.4156
		86.39	86.2633	-7.25	-6.60667	48.1	44.7467	48.6433	45.2362	98.5715	98.4669
		85.82		-6.32		38.12		38.6404		99.4136
	XB1	86.28		-7.27		36.01		36.7365		101.414
		86.46	86.7733	-7.99	-7.92	40	36.47	40.7902	37.3305	101.296	102.329
		87.58		-8.5		33.4		34.4646		104.278
	XB2	85.8		-7.1		37.98		38.6379		100.589
		85.57	85.6167	-6.74	-6.82	40.01	38.8967	40.5737	39.4913	99.5621	99.9526
		85.48		-6.62		38.7		39.2621		99.707
	XB3	86.69		-8.35		37.04		37.9695		102.704
		86.24	86.1533	-7.82	-7.77	35.98	36.27	36.82	37.0949	102.262	102.083
		85.53		-7.14		35.79		36.4953		101.282
Petal subepidermal layer	CZ1	84.75		-2.85		77.65		77.7023		92.102
		86.21	85.3533	-3.8	-3.62	81.86	77.8233	81.9482	77.9101	92.6578	92.6726
		85.1		-4.21		73.96		74.0797		93.2579
	CZ2	86.91		-5.83		74.57		74.7976		94.4704
		86.86	85.39	-5.78	-4.48333	67.7	70.3333	67.9463	70.4995	94.8799	93.6279
		82.4		-1.84		68.73		68.7546		91.5335
	CZ3	87.17		-5.74		74.3		74.5214		94.4176
		87.65	87.87	-5.97	-6.65	75.52	74.2033	75.7556	74.5106	94.5199	95.132
		88.79		-8.24		72.79		73.2549		96.4585
	ZD1	85.01		-7.45		69.81		70.2064		96.0914
		85.98	84.5967	-8.66	-8.03	67.5	61.83	68.0533	62.3653	97.3109	97.6023
		82.8		-7.98		48.18		48.8364		99.4045
	ZD2	83.32		-5.83		59.07		59.357		95.6366
		86.69	84.5833	-9.51	-7.34667	57.4	54.35	58.1825	54.8663	99.4073	97.743
		83.74		-6.7		46.58		47.0594		98.1852
	ZD3	86.49		-9.43		73.02		73.6264		97.3586
		84.79	85.1833	-8.46	-8.93333	68.25	64.2267	68.7723	64.8584	97.0661	98.0857
		84.27		-8.91		51.41		52.1764		99.8324
	XB1	87.15		-9.54		39.86		40.9857		103.46
		86.09	86.65	-8.82	-9.16333	40.64	40.3033	41.5861	41.3335	102.245	102.812
		86.71		-9.13		40.41		41.4286		102.731
	XB2	84.37		-7.19		42.41		43.0152		99.6222
		85.49	84.65	-7.72	-7.25333	35.38	40.5433	36.2125	41.1999	102.309	100.271
		84.09		-6.85		43.84		44.3719		98.8807
	XB3	83.95		-7.14		41.01		41.6269		99.8764
		84.78	84.5667	-7.86	-7.70333	41.62	41.17	42.3557	41.8864	100.694	100.597
		84.97		-8.11		40.88		41.6767		101.221
