# Supplementary material for: Metabolome and transcriptome integration reveals insights into petals coloration mechanism of three species in Sect. Chrysantha chang
Source: PeerJ. 2024 Apr 19;12:e17275. doi: 10.7717/peerj.17275 (PMC11034495; doi:10.7717/peerj.17275)
Supplement: Supplemental Information 5 [file peerj-12-17275-s005.xlsx]

## Sheet: Sheet1
Table S4 Raw data for carotenoid and flavonoid contents.
carotenoid				flavonoid
sample	abs	mean	contents	sample	CG	EG	mean	Δ	contents
CZ1	0.262	0.291667	0.1048	CZ1	0.461	0.738	0.977667	0.277	4.77495
	0.328		0.1312	CZ2		1.056		0.595	10.8657
CZ2	0.27		0.108	CZ3		1.139		0.678	12.4555
	0.361		0.1444	ZD1	0.408	0.629	0.657	0.221	3.70236
CZ3	0.264		0.1056	ZD2		0.725		0.317	5.54108
	0.265		0.106	ZD3		0.617		0.209	3.47251
ZD1	0.174	0.124833	0.0696	XB1	0.727	0.858	0.858	0.131	1.97855
	0.169		0.0676	XB2		0.857		0.13	1.95939
ZD2	0.122		0.0488	XB3		0.859		0.132	1.9977
	0.097		0.0388
ZD3	0.094		0.0376
	0.093		0.0372
XB1	0.098	0.0801667	0.0392
	0.067		0.0268
XB2	0.103		0.0412
	0.086		0.0344
XB3	0.064		0.0256
	0.063		0.0252
