# Supplementary material for: Metabolome and transcriptome integration reveals insights into petals coloration mechanism of three species in Sect. Chrysantha chang
Source: PeerJ. 2024 Apr 19;12:e17275. doi: 10.7717/peerj.17275 (PMC11034495; doi:10.7717/peerj.17275)
Supplement: Supplemental Information 6 [file peerj-12-17275-s006.xlsx]

## Sheet: Sheet1
Table S5 36 DAFs enriched in the flavonoid biosynthesis pathway of three species of Sect. Chrysantha Chang.
Compounds	Index	Formula	Class II	Meta-CZ1	Meta-CZ2	Meta-CZ3	Meta-ZD1	Meta-ZD2	Meta-ZD3	Meta-XB1	Meta-XB2	Meta-XB3	kegg_map
6''-O-Malonylgenistin	pmp000194	C24H22O13	Isoflavones	4582.3	8819.8	3985.2	12586	14680	14727	19376	14691	17672	ko00943
Genistein	mws0063	C15H10O5		53204	37347	53728	40042	43072	51549	18316	22489	24503	ko00943,ko01100,ko01110
Leucocyanidin	Cmjp003100	C15H14O7	Flavanols	14416	14424	13416	45410	41197	46930	26699	27439	27387	ko00941,ko01100,ko01110
Afzelechin (3,5,7,4'-Tetrahydroxyflavan)	pme3285	C15H14O5		34442	32345	31567	67360	63456	66789	52431	51342	50934	ko00941,ko01110
Catechin*	MWSHY0065	C15H14O6		421440	454000	474860	855050	805910	777770	694330	694400	621610	ko00941,ko01110
Epiafzelechin	mws1422	C15H14O5		34252	39984	29051	62401	103750	73873	50726	50417	43296	ko00941,ko01110
Epigallocatechin	mws0042	C15H14O7		9	9	9	9999200	10489000	10283000	10847000	12096000	10700000	ko00941,ko01110
Apigenin-8-C-Glucoside (Vitexin)*	MWSHY0181	C21H20O10	Flavonoid carbonoside	245140	297600	294700	2479200	2703100	1819900	9629.6	4435.3	13988	ko00941,ko00944
Apigenin-6-C-glucoside (Isovitexin)*	MWSHY0008	C21H20O10		239810	266260	225750	1836900	1911100	2095400	14714	11426	6230.1	ko00944
Myricetin	mws0032	C15H10O8	Flavonols	391200	386770	409290	9	9	9	52938	64955	83941	ko00941,ko00944,ko01110
Quercetin	MWSHY0029	C15H10O7		621590	578970	575290	31940	33511	33459	12166	13339	12545	ko00941,ko00944,ko01100,ko01110
Quercetin-3-O-rhamnoside(Quercitrin)	mws0045	C21H20O11		7167200	7335600	8845700	1765200	1850200	1766600	1096000	1099600	1207000	ko00944
Quercetin-3-O-sophoroside (Baimaside)	MWSHY0162	C27H30O17		15149000	14732000	13314000	2676400	3053100	3896100	1078800	890350	926720	ko00944
Quercetin-3-O-sambubioside	Lmjp002596	C26H28O16		12134000	12662000	13126000	3882200	3586700	3973600	532060	534140	483670	ko00944
Quercetin-3-O-rutinoside (Rutin)	MWSHY0067	C27H30O16		7873000	7529400	6311900	5587000	5882000	5751100	306180	410580	355430	ko00944,ko01100,ko01110
Kaempferol-3-O-rutinoside(Nicotiflorin)	MWSHY0050	C27H30O15		28988000	27722000	29028000	7618000	7014500	6636500	36776000	37365000	39176000	ko00944,ko01110
Kaempferol (3,5,7,4'-Tetrahydroxyflavone)	mws1068	C15H10O6		3691.9	3590.5	4214.5	21750	18696	20519	9649.1	9728.2	9948.7	ko00941,ko00944,ko01100,ko01110
Kaempferol-3-O-glucoside (Astragalin)	MWSHY0136	C21H20O11		766670	918020	837850	3688600	4223700	4480000	2606900	2179600	2087800	ko00944,ko01110
Luteolin-7-O-neohesperidoside (Lonicerin)	MWSHY0080	C27H30O15	Flavones	1560600	1675100	1965100	696680	629070	640580	629580	719890	786330	ko00944
Apigenin-7-O-glucoside(Cosmosiin)	MWSHY0189	C21H20O10		9559300	10065000	10675000	5581700	5606400	5619000	2822300	2933700	2302700	ko00944
Tricetin (5,7,3',4',5'-Pentahydroxyflavone)	mws0920	C15H10O7		82157	84953	78720	79804	70502	72590	244000	236410	229970	ko00941
Peonidin-3-O-glucoside	pmf0203	C22H23O11+	Anthocyanidins	208100	248590	201070	104820	118590	101940	75201	71369	69440	ko00942
Cyanidin-3-O-(2''-O-xylosyl)glucoside-5-O-glucoside	Lmjp001323	C32H39O20+		5423.8	6760.2	4187.5	9	9	9	801.44	1178	889.2	ko00942
Cyanidin-3-O-glucoside (Kuromanin)	pmb0550	C21H21O11+		1770300	1591200	1508600	9	9	9	1211500	1229800	1237200	ko00942
Cyanidin-3-O-Rutinoside (Keracyanin)	pme1773	C27H31O15+		1770300	1591200	1508600	1211500	1229800	1237200	9	9	9	ko00942
Cyanidin-3,5-O-diglucoside (Cyanin)	pme1777	C27H31O16+		38191	41849	37347	6775.4	6287.4	7513.6	25373	27325	25157	ko00942
Dihydromyricetin (Ampelopsin)	mws0744	C15H12O8	Flavanonols	58008	59348	57861	9	9	9	20062	19650	19832	ko00941,ko01110
Pinobanksin	mws0914	C15H12O5		10556	10427	9786	14723	17341	18040	32590	31380	35604	ko00941
Taxifolin(Dihydroquercetin)	mws0044	C15H12O7		162110	162910	157120	303970	306240	299360	109020	102030	112390	ko00941,ko01100,ko01110
Naringenin-7-O-glucoside (Prunin)	mws1179	C21H22O10	Flavanones	34590000	35168000	34773000	4157800	4201100	4336800	10921000	11905000	10318000	ko00941
Naringenin-7-O-Neohesperidoside(Naringin)	mws0046	C27H32O14		2588800	2782900	2709000	22156	25987	16935	9	9	9	ko00941
Naringenin (5,7,4'-Trihydroxyflavanone)	pme0376	C15H12O5		76121	69651	74604	31528	32382	31533	27026	23040	23687	ko00941,ko00943,ko01100,ko01110
Hesperetin-7-O-neohesperidoside(Neohesperidin)	MWSHY0019	C28H34O15		4201000	4505500	4627100	1434500	1497800	1434800	9	9	9	ko00941
Phloretin-2'-O-glucoside (Phlorizin)	mws2118	C21H24O10	Chalcones	730970	683480	748390	101600	108110	103110	39006	40227	39182	ko00941,ko01110
3,4,2',4',6'-Pentahydroxychalcone-4'-O-glucoside	Lmsn003297	C21H22O11		73248	72816	66535	58176	59656	52473	151090	153480	162010	ko00941
Naringenin chalcone; 2',4,4',6'-Tetrahydroxychalcone	pme2960	C15H12O5		3438900	2935000	3243800	2629500	2739800	2563800	1229900	1298700	1357300	ko00941,ko01100,ko01110
