# Supplementary material for: Metabolome and transcriptome integration reveals insights into petals coloration mechanism of three species in Sect. Chrysantha chang
Source: PeerJ. 2024 Apr 19;12:e17275. doi: 10.7717/peerj.17275 (PMC11034495; doi:10.7717/peerj.17275)
Supplement: Supplemental Information 7 [file peerj-12-17275-s007.xlsx]

## Sheet: Sheet1
Table S6 Summary of sequencing data and quality inspection.
Sample	RawReads	CleanReads	CleanRatio	RawBases(bp)	CleanBases(bp)	Q20	Q30	GC
CZ1	40224578	40166582	0.9986	6033686700	5896473995	0.9757	0.9349	0.4593
CZ2	37291306	37248874	0.9989	5593695900	5475897931	0.9769	0.9365	0.4607
CZ3	37538350	37489250	0.9987	5630752500	5478489542	0.9774	0.9375	0.4591
XB1	50720214	50645090	0.9985	7608032100	7421936042	0.9731	0.9299	0.4587
XB2	42102646	42014962	0.9979	6315396900	6139302803	0.9775	0.9386	0.4557
XB3	49406498	49357696	0.999	7410974700	7264923876	0.9745	0.9322	0.4587
ZD1	40824812	40775898	0.9988	6123721800	6000604282	0.9767	0.9366	0.4551
ZD2	39276676	39221792	0.9986	5891501400	5738296000	0.9771	0.9377	0.4508
ZD3	38561180	38506864	0.9986	5784177000	5650402201	0.9767	0.9368	0.4561
