# Supplementary material for: Metabolome and transcriptome integration reveals insights into petals coloration mechanism of three species in Sect. Chrysantha chang
Source: PeerJ. 2024 Apr 19;12:e17275. doi: 10.7717/peerj.17275 (PMC11034495; doi:10.7717/peerj.17275)
Supplement: Supplemental Information 8 [file peerj-12-17275-s008.xlsx]

## Sheet: Sheet1
Table S7 The assembly results of transcriptome.
Item	Total 'genes'	Total	Median	Average contig length	Total	Contig N10	Contig N20	Contig N30	Contig N40	Contig N50
		transcripts	contig length		assembled bases
count	154185	298123	346（bp）	625.47（bp）	96438404	3219	2357	1803	1350	966
