# Supplementary material for: Metabolome and transcriptome integration reveals insights into petals coloration mechanism of three species in Sect. Chrysantha chang
Source: PeerJ. 2024 Apr 19;12:e17275. doi: 10.7717/peerj.17275 (PMC11034495; doi:10.7717/peerj.17275)
Supplement: Supplemental Information 9 [file peerj-12-17275-s009.xlsx]

## Sheet: Sheet1
Table S8 Numbers of unigenes annotated with various databases.
Batabases	ALL	Annotation	Uniprot	Pfam	GO	KEGG	Pathway	eggNOG	Nr
count	154185	47277	38987	20990	39287	20262	19912	32653	31490
proportion	1	0.31	0.25	0.14	0.25	0.13	0.13	0.21	0.2
