# Supplementary material for: Metabolome and transcriptome integration reveals insights into petals coloration mechanism of three species in Sect. Chrysantha chang
Source: PeerJ. 2024 Apr 19;12:e17275. doi: 10.7717/peerj.17275 (PMC11034495; doi:10.7717/peerj.17275)
Supplement: Supplemental Information 10 [file peerj-12-17275-s010.xlsx]

## Sheet: Sheet1
Table S9 37 DEGs mapped in the flavonoid biosynthesis pathways of three species of Sect. Chrysantha Chang.
ID	annotation	Gene	Gene-CZ1	Gene-CZ2	Gene-CZ3	Gene-ZD1	Gene-ZD2	Gene-ZD3	Gene-XB1	Gene-XB2	Gene-XB3
TRINITY_DN22330_c0_g2	anthocyanidin 3-O-glucoside 2''-O-glucosyltransferase	3GGT(22330_c0_g2)	16.11	16.92	16.476	1.999	1.926	2.192	1.693	2.092	1.696
TRINITY_DN26965_c2_g2	anthocyanin 3'-O-beta-glucosyltransferase	3GT(26965_c2_g2)	0.693	0.699	0.587	1.022	0.903	0.863	0.171	0.251	0.025
TRINITY_DN23660_c3_g4	anthocyanin 3-O-glucoside-6''-O-malonyltransferase	3MaT1(23660_c3_g4)	0	0	0	0.951	0.946	0.361	0.694	0.084	0.037
TRINITY_DN28732_c0_g1	anthocyanin 5-O-glucoside-4'''-O-malonyltransferase	5MaT2(28732_c0_g1)	13.003	13.713	13.774	71.518	68.406	75.079	0.402	0.442	0.545
TRINITY_DN30808_c1_g4	flavanone 7-O-glucoside 2''-O-beta-L-rhamnosyltransferase	C12RT1(30808_c1_g4)	35.084	42.37	44.264	53.516	39.223	44.896	800.665	952.537	1148.08
TRINITY_DN32736_c2_g1	flavanone 7-O-glucoside 2''-O-beta-L-rhamnosyltransferase	C12RT1(32736_c2_g1)	47.659	42.774	42.895	77.88	63.88	67.445	1341.63	1121.06	1290.89
TRINITY_DN104875_c0_g1	caffeoyl-CoA O-methyltransferase	CCOAOMT(104875_c0_g1)	0	0	0	0.089	0	0.044	2.375	2.522	2.772
TRINITY_DN21984_c0_g1	caffeoyl-CoA O-methyltransferase	CCOAOMT(21984_c0_g1)	1.793	1.801	0.809	0.844	0.23	0.431	0.767	1.315	0.928
TRINITY_DN24806_c0_g2	caffeoyl-CoA O-methyltransferase	CCOAOMT(24806_c0_g2)	3.312	3.107	4.372	1.928	2.779	2.492	3.679	4.076	3.478
TRINITY_DN25410_c2_g1	caffeoyl-CoA O-methyltransferase	CCOAOMT(25410_c2_g1)	22.428	19.595	19.124	3.572	3.367	2.333	42.851	43.101	45.745
TRINITY_DN27235_c0_g1	caffeoyl-CoA O-methyltransferase	CCOAOMT(27235_c0_g1)	9.742	9.145	8.967	6.131	5.063	4.517	4.348	3.347	3.379
TRINITY_DN31373_c2_g3	caffeoyl-CoA O-methyltransferase	CCOAOMT(31373_c2_g3)	0.825	1.149	0.693	0.24	0.188	0.229	0	0.299	0
TRINITY_DN20522_c0_g1	chalcone isomerase	CHI(20522_c0_g1)	5.35	6.02	6.7	2.599	2.861	2.87	1.693	1.626	1.63
TRINITY_DN9893_c0_g1	kaempferol 3-O-beta-D-galactosyltransferase	F6H(31227_c1_g1)	56.738	61.404	61.708	11.542	11.677	14.915	300.093	316.839	322.087
TRINITY_DN28055_c2_g1	flavonoid 3'-monooxygenase	CYP75B1(28055_c2_g1)	289.887	294.687	319.676	1504.32	1616.97	1555.47	2408.56	2640.97	3131.77
TRINITY_DN27090_c3_g2	isoflavone/4'-methoxyisoflavone 2'-hydroxylase	CYP81E(27090_c3_g2)	1.294	1.103	1.12	0.524	0.222	0.299	0.365	0.394	0.359
TRINITY_DN29709_c0_g1	isoflavone/4'-methoxyisoflavone 2'-hydroxylase	CYP81E(29709_c0_g1)	11.25	3.879	9.286	4.309	17.148	15.074	24.471	31.34	24.94
TRINITY_DN23882_c0_g2	3,9-dihydroxypterocarpan 6a-monooxygenase	CYP93A1(23882_c0_g2)	9.986	9.724	8.549	5.758	6.631	6.313	1.547	0.992	1.089
TRINITY_DN22091_c0_g2	bifunctional dihydroflavonol 4-reductase/flavanone 4-reductase	DFR1(22091_c0_g2)	3.252	3.026	2.703	31.864	29.641	28.881	5.104	5.809	6.882
TRINITY_DN27841_c2_g1	bifunctional dihydroflavonol 4-reductase/flavanone 4-reductase	DFR2(27841_c2_g1)	6.297	4.889	5.124	32.245	33.01	30.43	8.376	7.537	7.669
TRINITY_DN30430_c0_g1	bifunctional dihydroflavonol 4-reductase/flavanone 4-reductase	DFR3(30430_c0_g1)	0.219	0.048	0.21	3.145	4.551	4.667	1.885	2.307	1.449
TRINITY_DN9893_c0_g1	kaempferol 3-O-beta-D-galactosyltransferase	[EC:2.4.1.234](9893_c0_g1)	0.234	0.138	0.16	0.107	0	0	0.341	0.203	0.408
TRINITY_DN22278_c3_g3	flavonol synthase	FLS(22278_c3_g3)	168.279	161.222	168.437	87.95	86.523	98.481	1.644	1.96	2.884
TRINITY_DN30503_c0_g1	anthocyanidin 5,3-O-glucosyltransferase	GT1(30503_c0_g1)	123.33	119.445	132.285	150.597	168.79	193.231	11.34	27.216	24.308
TRINITY_DN24756_c3_g2	shikimate O-hydroxycinnamoyltransferase	HCT(24756_c3_g2)	0.571	0.983	0.915	0.231	0.256	0.088	0.11	0.239	0.297
TRINITY_DN28798_c1_g1	shikimate O-hydroxycinnamoyltransferase	HCT(28798_c1_g1)	16.834	17.086	16.511	9.09	9.461	10.258	5.993	6.323	6.684
TRINITY_DN30121_c2_g1	shikimate O-hydroxycinnamoyltransferase	HCT(30121_c2_g1)	48.984	62.856	63.814	20.178	26.515	23.606	5.883	6.67	12.439
TRINITY_DN32333_c1_g1	shikimate O-hydroxycinnamoyltransferase	HCT(32333_c1_g1)	50.074	45.001	55.585	42.503	49.199	43.642	4.034	2.634	2.501
TRINITY_DN22577_c0_g2	leucoanthocyanidin reductase	LAR1(22577_c0_g2)	9.418	9.819	9.738	65.787	63.592	63.957	5.493	6.239	7.142
TRINITY_DN25214_c1_g1	leucoanthocyanidin reductase	LAR2(25214_c1_g1)	1.523	1.351	1.708	15.672	14.099	12.797	4.638	4.932	4.262
TRINITY_DN30294_c1_g1	desmethylxanthohumol 6'-O-methyltransferase	OMT1(30294_c1_g1)	3.281	3.989	3.03	11.791	13.432	9.148	10.086	6.598	6.906
TRINITY_DN17322_c0_g1	xanthohumol 4'-O-methyltransferase	OMT2(17322_c0_g1)	1.783	2.206	1.493	0.098	0	0	0	0	0.037
TRINITY_DN31777_c1_g1	hydroxyjasmonate sulfotransferase	SOT15(31777_c1_g1)	8.814	8.823	9.82	10.085	9.597	9.721	23.277	22.196	30.138
TRINITY_DN30808_c1_g2	beta-D-glucosyl crocetin beta-1,6-glucosyltransferase	UGT94E5(30808_c1_g2)	28.002	21.994	19.39	18.997	21.239	20.7	461.108	478.988	597.587
TRINITY_DN23461_c0_g1	vestitone reductase	VR(23461_c0_g1)	21.185	20.827	19.835	7.917	8.429	8.285	5.201	3.849	5.26
TRINITY_DN30713_c1_g1	vestitone reductase	VR(30713_c1_g1)	27.615	33.243	26.18	15.052	18.972	17.187	40.293	39.109	42.577
TRINITY_DN30713_c1_g2	vestitone reductase	VR(30713_c1_g2)	107.301	99.611	99.272	9.099	9	8.99	28.283	25.913	25.868
