# Supplementary material for: Metabolome and transcriptome integration reveals insights into petals coloration mechanism of three species in Sect. Chrysantha chang
Source: PeerJ. 2024 Apr 19;12:e17275. doi: 10.7717/peerj.17275 (PMC11034495; doi:10.7717/peerj.17275)
Supplement: Supplemental Information 11 [file peerj-12-17275-s011.xlsx]

## Sheet: Sheet1
Table S10 Transcription factors involved in correlation analysis.
ID	Gene	Annotation	CZ1	CZ2	CZ3	ZD1	ZD2	ZD3	XB1	XB2	XB3
TRINITY_DN22153_c0_g1	CcMYB1	PAP1/MYB75;transcription factor MYB75	6.573	3.75	2.586	2.568	2.71	2.087	1.449	1.9	1.77
TRINITY_DN8054_c0_g1	CcMYB2	MYBP;transcription factor MYB, plant	0.173	0.074	0.107	0	0	0	0.865	0.394	0.582
TRINITY_DN31957_c1_g3	CcMYB3		3.628	3.989	4.79	8.405	8.574	7.731	14.483	9.729	10.52
TRINITY_DN31887_c2_g1	CcMYB4		43.858	37.352	47.392	52.663	67.571	62.928	72.06	79.341	55.585
TRINITY_DN31822_c2_g1	CcMYB5		0.071	0.037	0.036	0.036	0.051	0	0.621	1.135	0.767
TRINITY_DN31451_c0_g2	CcMYB6		3.271	2.454	3.084	0	0	0	0.487	0.335	0.47
TRINITY_DN30196_c2_g1	CcMYB7		4.891	5.845	5.261	4.425	4.671	3.566	15.348	15.323	17.588
TRINITY_DN28571_c1_g2	CcMYB8		0	0	0.124	0	0.247	0.062	1.06	1.135	1.337
TRINITY_DN28501_c1_g1	CcMYB9		0.927	0.404	0.48	2.257	1.023	1.638	1.084	1.327	2.265
TRINITY_DN28475_c3_g1	CcMYB10		0	0	0	0.746	0.98	1.55	3.277	3.012	2.203
TRINITY_DN28239_c1_g1	CcMYB11		1.895	2.151	1.617	0.853	0.716	0.713	3.873	3.538	2.871
TRINITY_DN27802_c3_g2	CcMYB12		0.469	0.46	0.187	0.107	0.034	0	0.974	1.231	0.755
TRINITY_DN27802_c3_g1	CcMYB13		0.937	0.818	0.738	0.56	0.622	0.96	4.3	4.685	5.285
TRINITY_DN27802_c1_g1	CcMYB14		0.326	0.689	0.329	1.484	1.423	0.872	0.353	0.705	0.371
TRINITY_DN27567_c0_g1	CcMYB15		2.731	2.077	2.568	2.879	3.154	3.531	8.124	7.028	7.5
TRINITY_DN26894_c2_g4	CcMYB16		0	2.197	0	0	3.239	0	51.633	60.42	37.651
TRINITY_DN26771_c1_g1	CcMYB17		20.747	16.397	17.462	4.496	5.821	4.711	10.695	12.49	8.973
TRINITY_DN26386_c2_g3	CcMYB18		0.846	0.781	1.369	3.847	3.205	3.513	0.828	0.813	1.015
TRINITY_DN26311_c1_g5	CcMYB19		0.571	0.101	0.462	1.075	0.52	0.836	0	0.143	0.037
TRINITY_DN26311_c1_g1	CcMYB20		0	0.064	0.116	0	0.111	0	1.608	1.446	1.027
TRINITY_DN25744_c1_g4	CcMYB21		0.194	0.064	0.124	0.426	1.048	1.109	1.206	1.602	1.832
TRINITY_DN25744_c1_g3	CcMYB22		29.602	28.446	29.041	22.551	24.572	25.191	4.214	4.052	5.31
TRINITY_DN25259_c1_g3	CcMYB23		7.184	8.382	6.105	6.38	6.674	5.706	2.643	1.602	1.696
TRINITY_DN25259_c1_g1	CcMYB24		0.937	0.772	0.56	1.928	1.952	1.444	0.56	0.526	0.631
TRINITY_DN24905_c4_g3	CcMYB25		2.548	1.673	2.675	16.473	11.293	9.905	2.144	2.032	1.275
TRINITY_DN24905_c4_g2	CcMYB26		20.319	13.29	14.663	53.001	51.3	47.793	8.928	8.223	10.632
TRINITY_DN24567_c4_g1	CcMYB27		3.923	2.178	3.119	0.187	1.372	0.493	1.693	2.271	3.837
TRINITY_DN24527_c4_g1	CcMYB28		34.361	36.543	36.595	17.415	17.805	18.613	10.548	10.47	8.998
TRINITY_DN24315_c2_g1	CcMYB29		0.397	0.726	0.666	0.373	0.264	0.387	0.889	0.299	0.557
TRINITY_DN23906_c0_g2	CcMYB30		0.204	0.239	0.302	1.493	1.892	1.602	0.268	0.359	0.161
TRINITY_DN23906_c0_g1	CcMYB31		1.549	1.323	1.324	0.515	0.469	0.608	6.979	7.195	7.897
TRINITY_DN22349_c0_g2	CcMYB32		2.955	2.187	7.136	12.404	11.677	9.21	10.122	17.905	15.496
TRINITY_DN22125_c2_g2	CcMYB33		5.9	3.63	3.101	3.838	6.281	3.628	0.171	0.108	0.347
TRINITY_DN21321_c0_g1	CcMYB34		1.997	2.371	2.097	7.384	5.949	7	1.06	0.717	0.854
TRINITY_DN20870_c0_g2	CcMYB35		2.048	1.415	1.422	0.329	0.247	0.123	0.122	0.191	0.21
TRINITY_DN19404_c0_g1	CcMYB36		0.102	0.074	0.267	1.128	1.176	0.713	0.853	0.681	0.953
TRINITY_DN18975_c0_g1	CcMYB37		2.272	2.684	2.737	0.48	0.784	0.511	0.085	0	0.594
TRINITY_DN17480_c0_g1	CcMYB38		2.629	2.822	3.27	0.178	0.068	0.07	4.665	4.554	7.043
TRINITY_DN31603_c0_g3	CcHD-ZIP1		1.029	1.232	1.297	0.578	0.742	0.713	0.378	0.155	0.235
TRINITY_DN31278_c2_g4	CcHD-ZIP2	HD-ZIP;homeobox-leucine zipper protein	0.326	0.276	0.444	0.64	0.435	0.625	0.11	0.203	0.136
TRINITY_DN31093_c0_g3	CcHD-ZIP3		4.616	4.88	5.954	11.96	11.003	12.494	8.746	9.144	11.35
TRINITY_DN30742_c1_g3	CcHD-ZIP4		0	0.018	0	0.586	0.682	0.625	0.231	0.251	0.21
TRINITY_DN30121_c3_g1	CcHD-ZIP5		20.767	20.349	20.261	25.296	23.353	26.811	11.352	11.403	9.53
TRINITY_DN30121_c0_g1	CcHD-ZIP6		0.927	0.726	0.8	0	0.145	0	0.085	0.096	0
TRINITY_DN29719_c1_g1	CcHD-ZIP7		9.996	9.825	8.549	0.213	0.222	0.185	2.193	2.211	3.045
TRINITY_DN28864_c1_g1	CcHD-ZIP8		5.014	8.4	9.011	2.221	2.523	3.17	3.179	3.574	1.312
TRINITY_DN28329_c3_g1	CcHD-ZIP9		81.582	78.031	86.031	78.457	74.406	77.175	10.95	12.216	12.625
TRINITY_DN28010_c0_g2	CcHD-ZIP10		58.338	54.768	50.876	16.58	15.12	17.337	48.905	48.994	51.662
TRINITY_DN26775_c5_g1	CcHD-ZIP11		0.224	0.028	0.231	1.955	2.063	2.906	4.361	4.805	4.666
TRINITY_DN26399_c1_g1	CcHD-ZIP12		8.478	8.226	8.016	3.199	4.125	6.639	10.061	10.793	14.518
TRINITY_DN25400_c0_g2	CcHD-ZIP13		8.009	9.494	9.331	13.426	13.586	14.757	28.308	32.308	21.635
TRINITY_DN25207_c4_g2	CcHD-ZIP14		0.52	2.794	0.978	1.919	0.98	1.664	3.057	2.163	1.956
TRINITY_DN24870_c0_g2	CcHD-ZIP15		1.162	1.305	0.942	2.284	2.327	5.397	0.572	0.789	0.235
TRINITY_DN24870_c0_g1	CcHD-ZIP16		5.085	6.47	5.421	5.9	4.577	4.438	0.512	0.61	0.322
TRINITY_DN23980_c3_g1	CcHD-ZIP17		6.45	5.129	6.203	5.971	5.276	4.843	2.46	2.211	2.253
TRINITY_DN23772_c2_g1	CcHD-ZIP18		2.038	2.647	1.697	4.096	2.94	3.372	0.731	1.135	1.015
TRINITY_DN23282_c3_g5	CcHD-ZIP19		12.982	15.064	11.473	13.577	12.733	12.934	33.484	33.276	28.764
TRINITY_DN23173_c0_g1	CcHD-ZIP20		1.009	0.533	3.35	4.78	2.591	2.509	5.299	6.407	4.047
TRINITY_DN26452_c0_g1	CcAP2 1	OVM/ANT;AP2-like factor, ANT lineage	1.956	2.978	2.542	38.891	37.041	36.672	18.77	21.252	22.588
TRINITY_DN23415_c2_g5	CcAP2 2		0.204	0.156	0.284	1.733	1.159	1.506	0.853	1.375	1.597
TRINITY_DN23415_c2_g2	CcAP2 3		4.708	3.925	5.581	0.258	0.435	0.405	0.195	0.598	0.198
TRINITY_DN17606_c0_g1	CcAP2 4		0.245	0.193	0.373	0.133	0.179	0.097	0.828	0.574	0.656
TRINITY_DN32429_c3_g2	CcAP2 5	AP2;AP2-like factor, euAP2 lineage	7.877	10.092	15.258	24.594	23.217	25.516	25.129	23.666	22.105
TRINITY_DN31435_c4_g1	CcAP2 6		29.062	30.348	33.982	11.809	10.679	12.336	26.87	29.152	30.881
TRINITY_DN27747_c1_g1	CcAP2 7		0.194	0.064	0.116	1.448	1.142	1.18	0.073	0.036	0.025
TRINITY_DN24925_c0_g1	CcAP2 8		15.774	15.487	15.312	2.985	3.171	3.046	9.379	8.319	8.812
TRINITY_DN24830_c8_g1	CcAP2 9		1.029	1.213	1.084	0.178	0.486	0.141	0.828	1.327	0.705
TRINITY_DN24795_c4_g2	CcAP2 10		0.978	1.415	1.564	5.162	4.56	6.797	8.149	9.67	9.456
TRINITY_DN24795_c4_g1	CcAP2 11		10.282	9.476	10.557	1.706	1.918	1.981	6.358	5.558	6.82
TRINITY_DN32193_c5_g1	CcEREBP1	EREBP;EREBP-like factor	500.006	555.193	509.289	224.105	214.678	254.997	806.451	779.75	782.289
TRINITY_DN31997_c3_g1	CcEREBP2		2.853	3.915	3.59	1.679	1.807	2.052	16.736	14.606	16.635
TRINITY_DN30454_c1_g1	CcEREBP3		22.479	22.545	19.701	45.813	49.493	52.697	32.461	27.288	29.334
TRINITY_DN27895_c2_g1	CcEREBP4		0.978	0.809	0.729	1.866	2.046	2.016	1.084	0.669	0.928
TRINITY_DN27666_c1_g1	CcEREBP5		3.648	3.594	3.803	0.551	0.46	0.423	2.034	2.02	1.894
TRINITY_DN26563_c0_g1	CcEREBP6		2.191	4.007	2.826	2.47	2.156	2.166	1.06	1.41	1.3
TRINITY_DN25556_c2_g1	CcEREBP7		3.842	3.888	3.697	0.968	1.313	1.277	2.034	1.064	2.228
TRINITY_DN25541_c2_g6	CcEREBP8		1.202	0.781	0.995	0.187	0.102	0.255	0.292	0.239	0.173
TRINITY_DN25541_c2_g1	CcEREBP9		241.046	260.764	219.205	93.056	83.858	95.506	87.968	85.64	90.587
TRINITY_DN23963_c0_g3	CcEREBP10		5.503	7.362	8.593	1.351	1.543	1.303	14.032	16.901	15.174
TRINITY_DN23014_c1_g2	CcEREBP11		19.973	22.297	22.412	28.131	29.737	33.388	9.696	9.263	9.827
TRINITY_DN21580_c0_g1	CcEREBP12		12.238	13.354	14.618	13.097	12.631	15.1	50.586	44.236	50.672
TRINITY_DN18916_c0_g2	CcEREBP13		17.629	16.884	14.823	0.062	0.06	0.158	1.596	0.992	1.374
TRINITY_DN31022_c3_g4	CcWRKY1	WRKY33;WRKY transcription factor 33	1.875	2.178	1.511	1.75	1.96	2.597	8.015	7.793	7.686
TRINITY_DN31022_c3_g1	CcWRKY2		6.97	4.301	9.953	36.279	31.646	34.7	37.723	38.989	21.189
TRINITY_DN21976_c1_g2	CcWRKY3		1.6	1.93	1.706	1.626	0.733	0.511	1.437	2.044	1.609
TRINITY_DN60566_c0_g1	CcWRKY4	WRKY29;WRKY transcription factor 29	0	0.092	0.062	0.471	0.486	0.44	0.073	0.084	0.248
TRINITY_DN29770_c2_g5	CcWRKY5	WRKY22;WRKY transcription factor 22	0.306	0.377	0.826	0.649	0.673	1.347	0.305	0.203	0.359
TRINITY_DN23731_c2_g1	CcWRKY6		0.499	0.414	0.489	0.08	0.111	0.176	0.877	0.765	1.324
TRINITY_DN23535_c1_g1	CcWRKY7		11.739	8.456	9.66	4.283	4.935	4.332	8.587	9.634	5.978
TRINITY_DN30212_c0_g1	CcWRKY8	WRKY2;WRKY transcription factor 2	4.901	5.441	4.799	8.868	10.262	11.79	11.072	11.558	11.647
TRINITY_DN25722_c4_g1	CcWRKY9		3.189	3.3	3.715	9.179	8.259	9.333	8.551	9.192	7.847
TRINITY_DN25328_c1_g1	CcWRKY10		0.112	0.009	0.053	1.155	0.878	0.889	0.378	0.359	0.582
TRINITY_DN31940_c2_g2	CcMADS-box1	MADS-box;MADS-box transcription factor, plant	28.654	25.541	24.598	11.782	12.145	14.22	13.167	13.184	14.221
TRINITY_DN31556_c1_g1	CcMADS-box2		0.723	1.222	0.64	0.098	0	0.15	1.035	0.586	0.829
TRINITY_DN28278_c1_g1	CcMADS-box3		0.02	0.074	0.036	0.755	0.878	0.528	0.524	0.598	0.557
TRINITY_DN27553_c2_g2	CcMADS-box4		0.082	0.046	0.044	0.338	0.17	0.933	2.144	2.391	1.745
TRINITY_DN27283_c0_g1	CcMADS-box5		83.936	84.014	77.535	7.641	9.384	8.743	60.269	54.994	62.888
TRINITY_DN27016_c3_g1	CcMADS-box6		1.692	1.342	0.933	4.176	2.966	3.575	20.804	21.132	18.108
TRINITY_DN26446_c0_g1	CcMADS-box7		0.795	0.836	0.933	4.576	4.1	4.799	0.926	1.112	0.978
TRINITY_DN24413_c4_g1	CcMADS-box8		0.56	1.112	1.182	1.51	1.134	1.594	4.227	4.96	3.676
TRINITY_DN15713_c0_g1	CcMADS-box9		0.958	0.855	1.137	0.968	1.474	0.872	0.097	0.036	0.037
