# Supplementary material for: Metabolome and transcriptome integration reveals insights into petals coloration mechanism of three species in Sect. Chrysantha chang
Source: PeerJ. 2024 Apr 19;12:e17275. doi: 10.7717/peerj.17275 (PMC11034495; doi:10.7717/peerj.17275)
Supplement: Supplemental Information 12 [file peerj-12-17275-s012.xlsx]

## Sheet: Sheet1
Table S11 The correlation analysis of DEGs and DAFs mapped in flavonoid metabolic pathways.
Gene	Mate	Correlation	P-Value	Gene	Mate	Correlation	P-Value
3GGT(22330_c0_g2)	Quercetin	0.98	4.15e-06	DFR3(30430_c0_g1)	Naringenin-7-O-glucoside (Prunin)	-0.93	0.000334
3GGT(22330_c0_g2)	Quercetin-3-O-rhamnoside(Quercitrin)	0.98	6.01e-06	DFR2(27841_c2_g1)	Kaempferol-3-O-rutinoside(Nicotiflorin)	-0.93	0.000277
3GGT(22330_c0_g2)	Luteolin-7-O-neohesperidoside (Lonicerin)	0.98	7.47e-06	DFR3(30430_c0_g1)	Luteolin-7-O-neohesperidoside (Lonicerin)	-0.93	0.000221
3GGT(22330_c0_g2)	Naringenin (5,7,4'-Trihydroxyflavanone)	0.97	1.13e-05	DFR1(22091_c0_g2)	Naringenin-7-O-glucoside (Prunin)	-0.96	5.63e-05
3GGT(22330_c0_g2)	Phloretin-2'-O-glucoside (Phlorizin)	0.96	5.59e-05	DFR1(22091_c0_g2)	Cyanidin-3-O-glucoside (Kuromanin)	-0.96	4.19e-05
3GGT(22330_c0_g2)	Peonidin-3-O-glucoside	0.93	0.000246	DFR2(27841_c2_g1)	Cyanidin-3-O-glucoside (Kuromanin)	-0.98	4.41e-06
3GGT(22330_c0_g2)	Quercetin-3-O-sophoroside (Baimaside)	0.91	0.000631	DFR1(22091_c0_g2)	Dihydromyricetin (Ampelopsin)	-0.98	3.34e-06
3GGT(22330_c0_g2)	Naringenin-7-O-glucoside (Prunin)	0.87	0.0023	DFR1(22091_c0_g2)	Myricetin	-0.99	1.23e-06
3GGT(22330_c0_g2)	Apigenin-7-O-glucoside(Cosmosiin)	0.85	0.00356	DFR1(22091_c0_g2)	Cyanidin-3,5-O-diglucoside (Cyanin)	-0.99	1.78e-07
3GGT(22330_c0_g2)	Naringenin-7-O-Neohesperidoside(Naringin)	0.82	0.00728	DFR2(27841_c2_g1)	Dihydromyricetin (Ampelopsin)	-0.99	1.64e-07
3GGT(22330_c0_g2)	Quercetin-3-O-sambubioside	0.81	0.00785	DFR1(22091_c0_g2)	Cyanidin-3-O-(2''-O-xylosyl)glucoside-5-O-glucoside	-0.99	1.14e-07
3GGT(22330_c0_g2)	Pinobanksin	-0.83	0.00578	DFR2(27841_c2_g1)	Cyanidin-3-O-(2''-O-xylosyl)glucoside-5-O-glucoside	-0.99	7.22e-08
3GGT(22330_c0_g2)	Kaempferol (3,5,7,4'-Tetrahydroxyflavone)	-0.87	0.00206	DFR2(27841_c2_g1)	Myricetin	-1	2.84e-08
3GGT(22330_c0_g2)	Leucocyanidin	-0.88	0.00189	DFR2(27841_c2_g1)	Cyanidin-3,5-O-diglucoside (Cyanin)	-1	1.21e-08
3GGT(22330_c0_g2)	Kaempferol-3-O-glucoside (Astragalin)	-0.9	0.000847	F6H(31227_c1_g1)	3,4,2',4',6'-Pentahydroxychalcone-4'-O-glucoside	0.95	0.000113
3GGT(22330_c0_g2)	Catechin*	-0.91	0.000652	F6H(31227_c1_g1)	Kaempferol-3-O-rutinoside(Nicotiflorin)	0.92	0.000394
3GGT(22330_c0_g2)	6''-O-Malonylgenistin	-0.91	0.000598	F6H(31227_c1_g1)	Tricetin (5,7,3',4',5'-Pentahydroxyflavone)	0.9	0.00082
3GGT(22330_c0_g2)	Afzelechin (3,5,7,4'-Tetrahydroxyflavan)	-0.92	0.000533	F6H(31227_c1_g1)	Cyanidin-3-O-glucoside (Kuromanin)	0.85	0.00411
3GGT(22330_c0_g2)	Epigallocatechin	-1	6.28e-09	F6H(31227_c1_g1)	Hesperetin-7-O-neohesperidoside(Neohesperidin)	-0.83	0.00527
3GT(26965_c2_g2)	Apigenin-6-C-glucoside (Isovitexin)*	0.87	0.00244	F6H(31227_c1_g1)	Quercetin-3-O-rutinoside (Rutin)	-0.84	0.00495
3GT(26965_c2_g2)	Cyanidin-3-O-Rutinoside (Keracyanin)	0.84	0.00423	F6H(31227_c1_g1)	Cyanidin-3-O-Rutinoside (Keracyanin)	-0.86	0.00272
3GT(26965_c2_g2)	Quercetin-3-O-rutinoside (Rutin)	0.84	0.00463	F6H(31227_c1_g1)	Apigenin-8-C-Glucoside (Vitexin)*	-0.98	1.57e-06
3GT(26965_c2_g2)	Hesperetin-7-O-neohesperidoside(Neohesperidin)	0.83	0.00517	F6H(31227_c1_g1)	Taxifolin(Dihydroquercetin)	-0.99	8.63e-07
3GT(26965_c2_g2)	Tricetin (5,7,3',4',5'-Pentahydroxyflavone)	-0.84	0.00478	F6H(31227_c1_g1)	Apigenin-6-C-glucoside (Isovitexin)*	-0.99	5.11e-07
3GT(26965_c2_g2)	3,4,2',4',6'-Pentahydroxychalcone-4'-O-glucoside	-0.86	0.0026	FLS(22278_c3_g3)	Hesperetin-7-O-neohesperidoside(Neohesperidin)	1	1.25e-08
3MaT1(23660_c3_g4)	Epigallocatechin	0.98	1.4e-06	FLS(22278_c3_g3)	Quercetin-3-O-rutinoside (Rutin)	0.99	4.07e-08
3MaT1(23660_c3_g4)	Catechin*	0.97	2.43e-05	FLS(22278_c3_g3)	Cyanidin-3-O-Rutinoside (Keracyanin)	0.99	1.76e-07
3MaT1(23660_c3_g4)	Afzelechin (3,5,7,4'-Tetrahydroxyflavan)	0.96	3.48e-05	FLS(22278_c3_g3)	Naringenin chalcone; 2',4,4',6'-Tetrahydroxychalcone	0.99	1.93e-07
3MaT1(23660_c3_g4)	Kaempferol-3-O-glucoside (Astragalin)	0.96	4.7e-05	FLS(22278_c3_g3)	Quercetin-3-O-sambubioside	0.96	2.75e-05
3MaT1(23660_c3_g4)	Leucocyanidin	0.93	0.000239	FLS(22278_c3_g3)	Naringenin-7-O-Neohesperidoside(Naringin)	0.96	3.17e-05
3MaT1(23660_c3_g4)	Kaempferol (3,5,7,4'-Tetrahydroxyflavone)	0.93	0.000255	FLS(22278_c3_g3)	Genistein	0.95	0.000109
3MaT1(23660_c3_g4)	6''-O-Malonylgenistin	0.88	0.00168	FLS(22278_c3_g3)	Apigenin-7-O-glucoside(Cosmosiin)	0.93	0.000286
3MaT1(23660_c3_g4)	Epiafzelechin	0.8	0.00906	FLS(22278_c3_g3)	Quercetin-3-O-sophoroside (Baimaside)	0.89	0.00141
3MaT1(23660_c3_g4)	Quercetin-3-O-sophoroside (Baimaside)	-0.83	0.00563	FLS(22278_c3_g3)	Apigenin-8-C-Glucoside (Vitexin)*	0.87	0.00248
3MaT1(23660_c3_g4)	Peonidin-3-O-glucoside	-0.86	0.003	FLS(22278_c3_g3)	Apigenin-6-C-glucoside (Isovitexin)*	0.85	0.00377
3MaT1(23660_c3_g4)	Phloretin-2'-O-glucoside (Phlorizin)	-0.89	0.00117	FLS(22278_c3_g3)	Peonidin-3-O-glucoside	0.84	0.00474
3MaT1(23660_c3_g4)	Naringenin (5,7,4'-Trihydroxyflavanone)	-0.92	0.000439	FLS(22278_c3_g3)	Phloretin-2'-O-glucoside (Phlorizin)	0.83	0.00546
3MaT1(23660_c3_g4)	Naringenin-7-O-glucoside (Prunin)	-0.93	0.000294	FLS(22278_c3_g3)	3,4,2',4',6'-Pentahydroxychalcone-4'-O-glucoside	-0.93	0.000222
3MaT1(23660_c3_g4)	Quercetin	-0.93	0.00027	FLS(22278_c3_g3)	Pinobanksin	-0.94	0.000142
3MaT1(23660_c3_g4)	Quercetin-3-O-rhamnoside(Quercitrin)	-0.93	0.000236	FLS(22278_c3_g3)	Tricetin (5,7,3',4',5'-Pentahydroxyflavone)	-0.98	6.79e-06
3MaT1(23660_c3_g4)	Luteolin-7-O-neohesperidoside (Lonicerin)	-0.99	6.78e-07	GT1(30503_c0_g1)	Cyanidin-3-O-Rutinoside (Keracyanin)	0.96	4.02e-05
5MaT2(28732_c0_g1)	Apigenin-8-C-Glucoside (Vitexin)*	0.99	1.71e-07	GT1(30503_c0_g1)	Quercetin-3-O-rutinoside (Rutin)	0.96	4.04e-05
5MaT2(28732_c0_g1)	Apigenin-6-C-glucoside (Isovitexin)*	0.99	5.19e-07	GT1(30503_c0_g1)	Hesperetin-7-O-neohesperidoside(Neohesperidin)	0.95	8.61e-05
5MaT2(28732_c0_g1)	Taxifolin(Dihydroquercetin)	0.95	0.000109	GT1(30503_c0_g1)	Genistein	0.94	0.000138
5MaT2(28732_c0_g1)	Cyanidin-3-O-Rutinoside (Keracyanin)	0.94	0.000179	GT1(30503_c0_g1)	Apigenin-8-C-Glucoside (Vitexin)*	0.92	0.000383
5MaT2(28732_c0_g1)	Quercetin-3-O-rutinoside (Rutin)	0.92	0.000451	GT1(30503_c0_g1)	Naringenin chalcone; 2',4,4',6'-Tetrahydroxychalcone	0.92	0.000397
5MaT2(28732_c0_g1)	Hesperetin-7-O-neohesperidoside(Neohesperidin)	0.92	0.000489	GT1(30503_c0_g1)	Apigenin-6-C-glucoside (Isovitexin)*	0.92	0.000485
5MaT2(28732_c0_g1)	Genistein	0.87	0.00249	GT1(30503_c0_g1)	Quercetin-3-O-sambubioside	0.85	0.00412
5MaT2(28732_c0_g1)	Naringenin chalcone; 2',4,4',6'-Tetrahydroxychalcone	0.86	0.00325	GT1(30503_c0_g1)	Naringenin-7-O-Neohesperidoside(Naringin)	0.84	0.0045
5MaT2(28732_c0_g1)	Kaempferol-3-O-rutinoside(Nicotiflorin)	-0.84	0.00414	GT1(30503_c0_g1)	Taxifolin(Dihydroquercetin)	0.84	0.00502
5MaT2(28732_c0_g1)	Tricetin (5,7,3',4',5'-Pentahydroxyflavone)	-0.97	2.38e-05	GT1(30503_c0_g1)	Pinobanksin	-0.81	0.00766
5MaT2(28732_c0_g1)	3,4,2',4',6'-Pentahydroxychalcone-4'-O-glucoside	-0.99	9.27e-07	GT1(30503_c0_g1)	3,4,2',4',6'-Pentahydroxychalcone-4'-O-glucoside	-0.96	3.08e-05
[EC:2.4.1.234](9893_c0_g1)	Kaempferol-3-O-rutinoside(Nicotiflorin)	0.81	0.00866	GT1(30503_c0_g1)	Tricetin (5,7,3',4',5'-Pentahydroxyflavone)	-0.98	7.14e-06
C12RT1(30808_c1_g4)	Tricetin (5,7,3',4',5'-Pentahydroxyflavone)	0.99	5.22e-07	HCT(28798_c1_g1)	Quercetin-3-O-sophoroside (Baimaside)	0.99	3.75e-08
C12RT1(32736_c2_g1)	Tricetin (5,7,3',4',5'-Pentahydroxyflavone)	0.98	4.91e-06	HCT(32333_c1_g1)	Cyanidin-3-O-Rutinoside (Keracyanin)	0.99	4.7e-08
C12RT1(30808_c1_g4)	3,4,2',4',6'-Pentahydroxychalcone-4'-O-glucoside	0.96	3.43e-05	HCT(32333_c1_g1)	Hesperetin-7-O-neohesperidoside(Neohesperidin)	0.99	7.01e-08
C12RT1(32736_c2_g1)	Pinobanksin	0.95	0.000115	HCT(28798_c1_g1)	Phloretin-2'-O-glucoside (Phlorizin)	0.99	4.16e-07
C12RT1(32736_c2_g1)	3,4,2',4',6'-Pentahydroxychalcone-4'-O-glucoside	0.94	0.000171	HCT(32333_c1_g1)	Quercetin-3-O-rutinoside (Rutin)	0.99	8.38e-07
C12RT1(30808_c1_g4)	Pinobanksin	0.91	0.000611	HCT(28798_c1_g1)	Peonidin-3-O-glucoside	0.98	4.14e-06
C12RT1(32736_c2_g1)	Phloretin-2'-O-glucoside (Phlorizin)	-0.83	0.0055	HCT(28798_c1_g1)	Quercetin	0.98	6.43e-06
C12RT1(32736_c2_g1)	Peonidin-3-O-glucoside	-0.84	0.0042	HCT(28798_c1_g1)	Quercetin-3-O-rhamnoside(Quercitrin)	0.97	1.25e-05
C12RT1(30808_c1_g4)	Quercetin-3-O-sophoroside (Baimaside)	-0.85	0.00407	HCT(32333_c1_g1)	Naringenin chalcone; 2',4,4',6'-Tetrahydroxychalcone	0.97	1.33e-05
C12RT1(32736_c2_g1)	Apigenin-6-C-glucoside (Isovitexin)*	-0.86	0.003	HCT(28798_c1_g1)	Apigenin-7-O-glucoside(Cosmosiin)	0.97	1.42e-05
C12RT1(32736_c2_g1)	Apigenin-8-C-Glucoside (Vitexin)*	-0.86	0.00269	HCT(28798_c1_g1)	Naringenin-7-O-Neohesperidoside(Naringin)	0.97	1.48e-05
C12RT1(32736_c2_g1)	Quercetin-3-O-sophoroside (Baimaside)	-0.89	0.00139	HCT(28798_c1_g1)	Quercetin-3-O-sambubioside	0.97	1.87e-05
C12RT1(30808_c1_g4)	Apigenin-8-C-Glucoside (Vitexin)*	-0.9	0.000906	HCT(30121_c2_g1)	Naringenin-7-O-Neohesperidoside(Naringin)	0.97	2.54e-05
C12RT1(30808_c1_g4)	Apigenin-6-C-glucoside (Isovitexin)*	-0.9	0.000821	HCT(28798_c1_g1)	Naringenin (5,7,4'-Trihydroxyflavanone)	0.96	2.88e-05
C12RT1(30808_c1_g4)	Apigenin-7-O-glucoside(Cosmosiin)	-0.9	0.000805	HCT(30121_c2_g1)	Quercetin-3-O-sambubioside	0.96	4.41e-05
C12RT1(30808_c1_g4)	Genistein	-0.93	0.000328	HCT(30121_c2_g1)	Quercetin-3-O-sophoroside (Baimaside)	0.95	6.82e-05
C12RT1(30808_c1_g4)	Naringenin-7-O-Neohesperidoside(Naringin)	-0.93	0.000233	HCT(30121_c2_g1)	Phloretin-2'-O-glucoside (Phlorizin)	0.94	0.000157
C12RT1(32736_c2_g1)	Genistein	-0.94	0.000215	HCT(30121_c2_g1)	Apigenin-7-O-glucoside(Cosmosiin)	0.94	0.000159
C12RT1(30808_c1_g4)	Quercetin-3-O-sambubioside	-0.94	0.000201	HCT(30121_c2_g1)	Peonidin-3-O-glucoside	0.94	0.000185
C12RT1(32736_c2_g1)	Apigenin-7-O-glucoside(Cosmosiin)	-0.94	0.000173	HCT(32333_c1_g1)	Quercetin-3-O-sambubioside	0.94	0.000211
C12RT1(32736_c2_g1)	Naringenin-7-O-Neohesperidoside(Naringin)	-0.96	2.9e-05	HCT(30121_c2_g1)	Naringenin chalcone; 2',4,4',6'-Tetrahydroxychalcone	0.93	0.000232
C12RT1(32736_c2_g1)	Quercetin-3-O-sambubioside	-0.97	2.32e-05	HCT(32333_c1_g1)	Naringenin-7-O-Neohesperidoside(Naringin)	0.93	0.000254
C12RT1(30808_c1_g4)	Naringenin chalcone; 2',4,4',6'-Tetrahydroxychalcone	-0.98	7.8e-06	HCT(30121_c2_g1)	Quercetin-3-O-rhamnoside(Quercitrin)	0.92	0.000426
C12RT1(32736_c2_g1)	Naringenin chalcone; 2',4,4',6'-Tetrahydroxychalcone	-0.99	6.12e-07	HCT(32333_c1_g1)	Genistein	0.92	0.000435
C12RT1(32736_c2_g1)	Cyanidin-3-O-Rutinoside (Keracyanin)	-0.99	8.03e-08	HCT(30121_c2_g1)	Quercetin	0.91	0.000552
C12RT1(30808_c1_g4)	Quercetin-3-O-rutinoside (Rutin)	-0.99	6.05e-08	HCT(24756_c3_g2)	Luteolin-7-O-neohesperidoside (Lonicerin)	0.91	0.000697
C12RT1(30808_c1_g4)	Hesperetin-7-O-neohesperidoside(Neohesperidin)	-1	2.39e-08	HCT(28798_c1_g1)	Naringenin chalcone; 2',4,4',6'-Tetrahydroxychalcone	0.91	0.000699
C12RT1(32736_c2_g1)	Quercetin-3-O-rutinoside (Rutin)	-1	9.71e-09	HCT(32333_c1_g1)	Apigenin-7-O-glucoside(Cosmosiin)	0.91	0.000791
C12RT1(30808_c1_g4)	Cyanidin-3-O-Rutinoside (Keracyanin)	-1	8.47e-09	HCT(32333_c1_g1)	Apigenin-8-C-Glucoside (Vitexin)*	0.9	0.000814
C12RT1(32736_c2_g1)	Hesperetin-7-O-neohesperidoside(Neohesperidin)	-1	1.57e-09	HCT(32333_c1_g1)	Apigenin-6-C-glucoside (Isovitexin)*	0.9	0.000843
CCOAOMT(25410_c2_g1)	Kaempferol-3-O-rutinoside(Nicotiflorin)	0.99	3.86e-07	HCT(30121_c2_g1)	Naringenin (5,7,4'-Trihydroxyflavanone)	0.9	0.00106
CCOAOMT(27235_c0_g1)	Naringenin (5,7,4'-Trihydroxyflavanone)	0.97	2.41e-05	HCT(30121_c2_g1)	Hesperetin-7-O-neohesperidoside(Neohesperidin)	0.89	0.00119
CCOAOMT(27235_c0_g1)	Phloretin-2'-O-glucoside (Phlorizin)	0.96	3.06e-05	HCT(30121_c2_g1)	Quercetin-3-O-rutinoside (Rutin)	0.89	0.00141
CCOAOMT(27235_c0_g1)	Peonidin-3-O-glucoside	0.96	3.63e-05	HCT(30121_c2_g1)	Cyanidin-3-O-Rutinoside (Keracyanin)	0.87	0.00234
CCOAOMT(27235_c0_g1)	Quercetin	0.95	6.72e-05	HCT(30121_c2_g1)	Genistein	0.86	0.00285
CCOAOMT(27235_c0_g1)	Quercetin-3-O-sophoroside (Baimaside)	0.95	6.95e-05	HCT(28798_c1_g1)	Hesperetin-7-O-neohesperidoside(Neohesperidin)	0.86	0.00312
CCOAOMT(25410_c2_g1)	Cyanidin-3-O-glucoside (Kuromanin)	0.95	9.21e-05	HCT(28798_c1_g1)	Luteolin-7-O-neohesperidoside (Lonicerin)	0.86	0.00321
CCOAOMT(27235_c0_g1)	Quercetin-3-O-rhamnoside(Quercitrin)	0.95	0.00011	HCT(28798_c1_g1)	Quercetin-3-O-rutinoside (Rutin)	0.85	0.00342
CCOAOMT(27235_c0_g1)	Apigenin-7-O-glucoside(Cosmosiin)	0.94	0.00015	HCT(32333_c1_g1)	Quercetin-3-O-sophoroside (Baimaside)	0.84	0.00435
CCOAOMT(27235_c0_g1)	Naringenin-7-O-Neohesperidoside(Naringin)	0.93	0.00027	HCT(24756_c3_g2)	Quercetin-3-O-rhamnoside(Quercitrin)	0.84	0.0047
CCOAOMT(27235_c0_g1)	Quercetin-3-O-sambubioside	0.93	0.000328	HCT(28798_c1_g1)	Cyanidin-3-O-Rutinoside (Keracyanin)	0.83	0.0059
CCOAOMT(25410_c2_g1)	Dihydromyricetin (Ampelopsin)	0.92	0.000492	HCT(24756_c3_g2)	Quercetin	0.82	0.00655
CCOAOMT(25410_c2_g1)	Myricetin	0.9	0.000955	HCT(28798_c1_g1)	Genistein	0.82	0.00718
CCOAOMT(104875_c0_g1)	Pinobanksin	0.86	0.00261	HCT(30121_c2_g1)	6''-O-Malonylgenistin	-0.8	0.00926
CCOAOMT(25410_c2_g1)	Cyanidin-3,5-O-diglucoside (Cyanin)	0.86	0.00289	HCT(24756_c3_g2)	Kaempferol (3,5,7,4'-Tetrahydroxyflavone)	-0.8	0.00895
CCOAOMT(27235_c0_g1)	Naringenin chalcone; 2',4,4',6'-Tetrahydroxychalcone	0.85	0.00345	HCT(24756_c3_g2)	Catechin*	-0.81	0.00804
CCOAOMT(25410_c2_g1)	3,4,2',4',6'-Pentahydroxychalcone-4'-O-glucoside	0.85	0.00365	HCT(30121_c2_g1)	Epigallocatechin	-0.82	0.00721
CCOAOMT(25410_c2_g1)	Cyanidin-3-O-(2''-O-xylosyl)glucoside-5-O-glucoside	0.85	0.00395	HCT(24756_c3_g2)	Leucocyanidin	-0.83	0.00615
CCOAOMT(27235_c0_g1)	Luteolin-7-O-neohesperidoside (Lonicerin)	0.84	0.00482	HCT(30121_c2_g1)	Tricetin (5,7,3',4',5'-Pentahydroxyflavone)	-0.83	0.00538
CCOAOMT(24806_c0_g2)	Cyanidin-3-O-glucoside (Kuromanin)	0.84	0.00485	HCT(24756_c3_g2)	Kaempferol-3-O-glucoside (Astragalin)	-0.86	0.00325
CCOAOMT(24806_c0_g2)	Kaempferol-3-O-rutinoside(Nicotiflorin)	0.83	0.00543	HCT(24756_c3_g2)	Afzelechin (3,5,7,4'-Tetrahydroxyflavan)	-0.86	0.00299
CCOAOMT(24806_c0_g2)	Dihydromyricetin (Ampelopsin)	0.83	0.00613	HCT(24756_c3_g2)	Epigallocatechin	-0.86	0.00265
CCOAOMT(24806_c0_g2)	Myricetin	0.82	0.00721	HCT(28798_c1_g1)	6''-O-Malonylgenistin	-0.87	0.00212
CCOAOMT(27235_c0_g1)	Hesperetin-7-O-neohesperidoside(Neohesperidin)	0.8	0.0092	HCT(28798_c1_g1)	Epigallocatechin	-0.9	0.00084
CCOAOMT(104875_c0_g1)	Quercetin-3-O-rutinoside (Rutin)	-0.81	0.00884	HCT(32333_c1_g1)	Pinobanksin	-0.91	0.00055
CCOAOMT(104875_c0_g1)	Hesperetin-7-O-neohesperidoside(Neohesperidin)	-0.81	0.0084	HCT(30121_c2_g1)	Pinobanksin	-0.94	0.000146
CCOAOMT(24806_c0_g2)	Taxifolin(Dihydroquercetin)	-0.82	0.00643	HCT(28798_c1_g1)	Pinobanksin	-0.96	4.2e-05
CCOAOMT(104875_c0_g1)	Naringenin chalcone; 2',4,4',6'-Tetrahydroxychalcone	-0.86	0.00301	HCT(32333_c1_g1)	3,4,2',4',6'-Pentahydroxychalcone-4'-O-glucoside	-0.96	2.96e-05
CCOAOMT(104875_c0_g1)	Naringenin (5,7,4'-Trihydroxyflavanone)	-0.86	0.003	HCT(32333_c1_g1)	Tricetin (5,7,3',4',5'-Pentahydroxyflavone)	-0.99	1.04e-06
CCOAOMT(104875_c0_g1)	Quercetin-3-O-rhamnoside(Quercitrin)	-0.86	0.00294	LAR2(25214_c1_g1)	Kaempferol (3,5,7,4'-Tetrahydroxyflavone)	0.99	4.9e-08
CCOAOMT(104875_c0_g1)	Quercetin	-0.86	0.0029	LAR2(25214_c1_g1)	Leucocyanidin	0.99	1.02e-06
CCOAOMT(27235_c0_g1)	6''-O-Malonylgenistin	-0.87	0.00252	LAR2(25214_c1_g1)	Afzelechin (3,5,7,4'-Tetrahydroxyflavan)	0.98	6.22e-06
CCOAOMT(104875_c0_g1)	Quercetin-3-O-sambubioside	-0.88	0.0019	LAR1(22577_c0_g2)	Taxifolin(Dihydroquercetin)	0.97	9.55e-06
CCOAOMT(104875_c0_g1)	Phloretin-2'-O-glucoside (Phlorizin)	-0.88	0.00158	LAR2(25214_c1_g1)	Kaempferol-3-O-glucoside (Astragalin)	0.97	1.2e-05
CCOAOMT(104875_c0_g1)	Quercetin-3-O-sophoroside (Baimaside)	-0.88	0.00156	LAR2(25214_c1_g1)	Catechin*	0.97	1.49e-05
CCOAOMT(104875_c0_g1)	Apigenin-7-O-glucoside(Cosmosiin)	-0.89	0.00143	LAR2(25214_c1_g1)	Epiafzelechin	0.89	0.0012
CCOAOMT(104875_c0_g1)	Naringenin-7-O-Neohesperidoside(Naringin)	-0.89	0.00119	LAR1(22577_c0_g2)	Apigenin-6-C-glucoside (Isovitexin)*	0.88	0.00171
CCOAOMT(27235_c0_g1)	Epigallocatechin	-0.9	0.000978	LAR1(22577_c0_g2)	Apigenin-8-C-Glucoside (Vitexin)*	0.88	0.00193
CCOAOMT(104875_c0_g1)	Peonidin-3-O-glucoside	-0.91	0.000638	LAR2(25214_c1_g1)	Epigallocatechin	0.86	0.00307
CCOAOMT(25410_c2_g1)	Apigenin-8-C-Glucoside (Vitexin)*	-0.91	0.000628	LAR2(25214_c1_g1)	Cyanidin-3-O-glucoside (Kuromanin)	-0.87	0.00204
CCOAOMT(25410_c2_g1)	Apigenin-6-C-glucoside (Isovitexin)*	-0.93	0.000291	LAR2(25214_c1_g1)	Luteolin-7-O-neohesperidoside (Lonicerin)	-0.88	0.002
CCOAOMT(27235_c0_g1)	Pinobanksin	-0.95	9.84e-05	LAR1(22577_c0_g2)	Cyanidin-3-O-(2''-O-xylosyl)glucoside-5-O-glucoside	-0.9	0.000934
CCOAOMT(25410_c2_g1)	Taxifolin(Dihydroquercetin)	-0.98	1.44e-06	LAR2(25214_c1_g1)	Dihydromyricetin (Ampelopsin)	-0.91	0.000545
CHI(20522_c0_g1)	Phloretin-2'-O-glucoside (Phlorizin)	0.99	2.17e-07	LAR1(22577_c0_g2)	Cyanidin-3,5-O-diglucoside (Cyanin)	-0.92	0.000523
CHI(20522_c0_g1)	Quercetin-3-O-sophoroside (Baimaside)	0.99	4.01e-07	LAR2(25214_c1_g1)	Myricetin	-0.93	0.000261
CHI(20522_c0_g1)	Peonidin-3-O-glucoside	0.98	2.35e-06	LAR1(22577_c0_g2)	Myricetin	-0.94	0.00015
CHI(20522_c0_g1)	Quercetin-3-O-rhamnoside(Quercitrin)	0.98	3.27e-06	LAR2(25214_c1_g1)	Cyanidin-3,5-O-diglucoside (Cyanin)	-0.95	6.65e-05
CHI(20522_c0_g1)	Quercetin	0.98	4.99e-06	LAR1(22577_c0_g2)	Dihydromyricetin (Ampelopsin)	-0.96	5.31e-05
CHI(20522_c0_g1)	Apigenin-7-O-glucoside(Cosmosiin)	0.98	6.55e-06	LAR2(25214_c1_g1)	Cyanidin-3-O-(2''-O-xylosyl)glucoside-5-O-glucoside	-0.96	2.71e-05
CHI(20522_c0_g1)	Naringenin (5,7,4'-Trihydroxyflavanone)	0.97	9.95e-06	LAR1(22577_c0_g2)	Cyanidin-3-O-glucoside (Kuromanin)	-0.98	4.4e-06
CHI(20522_c0_g1)	Naringenin-7-O-Neohesperidoside(Naringin)	0.96	2.92e-05	LAR2(25214_c1_g1)	Naringenin-7-O-glucoside (Prunin)	-0.99	9.9e-08
CHI(20522_c0_g1)	Quercetin-3-O-sambubioside	0.96	3.33e-05	LAR1(22577_c0_g2)	Kaempferol-3-O-rutinoside(Nicotiflorin)	-1	2.78e-08
CHI(20522_c0_g1)	Naringenin chalcone; 2',4,4',6'-Tetrahydroxychalcone	0.89	0.00128	OMT1(30294_c1_g1)	Kaempferol-3-O-glucoside (Astragalin)	0.96	3.73e-05
CHI(20522_c0_g1)	Luteolin-7-O-neohesperidoside (Lonicerin)	0.87	0.0022	OMT1(30294_c1_g1)	Catechin*	0.95	7.01e-05
CHI(20522_c0_g1)	Hesperetin-7-O-neohesperidoside(Neohesperidin)	0.84	0.00431	OMT1(30294_c1_g1)	Afzelechin (3,5,7,4'-Tetrahydroxyflavan)	0.95	0.000102
CHI(20522_c0_g1)	Quercetin-3-O-rutinoside (Rutin)	0.83	0.00544	OMT1(30294_c1_g1)	Leucocyanidin	0.93	0.000234
CHI(20522_c0_g1)	Cyanidin-3-O-Rutinoside (Keracyanin)	0.81	0.00804	OMT1(30294_c1_g1)	Kaempferol (3,5,7,4'-Tetrahydroxyflavone)	0.93	0.000275
CHI(20522_c0_g1)	6''-O-Malonylgenistin	-0.89	0.0015	OMT1(30294_c1_g1)	Epigallocatechin	0.9	0.000829
CHI(20522_c0_g1)	Epigallocatechin	-0.91	0.000595	OMT1(30294_c1_g1)	Epiafzelechin	0.9	0.00108
CHI(20522_c0_g1)	Pinobanksin	-0.96	3.5e-05	OMT1(30294_c1_g1)	6''-O-Malonylgenistin	0.84	0.00467
CYP75B1(28055_c2_g1)	Epigallocatechin	0.97	1.73e-05	OMT2(17322_c0_g1)	Luteolin-7-O-neohesperidoside (Lonicerin)	0.82	0.00723
CYP75B1(28055_c2_g1)	Pinobanksin	0.92	0.000414	OMT1(30294_c1_g1)	Myricetin	-0.81	0.00881
CYP75B1(28055_c2_g1)	6''-O-Malonylgenistin	0.91	0.000695	OMT1(30294_c1_g1)	Quercetin	-0.81	0.00802
CYP75B1(28055_c2_g1)	Catechin*	0.82	0.00708	OMT1(30294_c1_g1)	Quercetin-3-O-rhamnoside(Quercitrin)	-0.82	0.00709
CYP75B1(28055_c2_g1)	Afzelechin (3,5,7,4'-Tetrahydroxyflavan)	0.82	0.00723	OMT1(30294_c1_g1)	Cyanidin-3,5-O-diglucoside (Cyanin)	-0.84	0.0045
CYP75B1(28055_c2_g1)	Kaempferol-3-O-glucoside (Astragalin)	0.8	0.00944	OMT1(30294_c1_g1)	Cyanidin-3-O-(2''-O-xylosyl)glucoside-5-O-glucoside	-0.85	0.00353
CYP75B1(28055_c2_g1)	Naringenin chalcone; 2',4,4',6'-Tetrahydroxychalcone	-0.81	0.00777	OMT1(30294_c1_g1)	Luteolin-7-O-neohesperidoside (Lonicerin)	-0.94	0.000174
CYP75B1(28055_c2_g1)	Quercetin-3-O-sambubioside	-0.91	0.000652	OMT1(30294_c1_g1)	Naringenin-7-O-glucoside (Prunin)	-0.94	0.000123
CYP75B1(28055_c2_g1)	Naringenin-7-O-Neohesperidoside(Naringin)	-0.91	0.000582	SOT15(31777_c1_g1)	Tricetin (5,7,3',4',5'-Pentahydroxyflavone)	0.97	1.89e-05
CYP75B1(28055_c2_g1)	Luteolin-7-O-neohesperidoside (Lonicerin)	-0.92	0.000412	SOT15(31777_c1_g1)	3,4,2',4',6'-Pentahydroxychalcone-4'-O-glucoside	0.95	0.00012
CYP75B1(28055_c2_g1)	Apigenin-7-O-glucoside(Cosmosiin)	-0.94	0.000195	SOT15(31777_c1_g1)	Pinobanksin	0.92	0.000462
CYP75B1(28055_c2_g1)	Quercetin-3-O-sophoroside (Baimaside)	-0.97	1.08e-05	SOT15(31777_c1_g1)	Peonidin-3-O-glucoside	-0.81	0.00859
CYP75B1(28055_c2_g1)	Peonidin-3-O-glucoside	-0.98	3.19e-06	SOT15(31777_c1_g1)	Quercetin-3-O-sophoroside (Baimaside)	-0.85	0.00375
CYP75B1(28055_c2_g1)	Quercetin-3-O-rhamnoside(Quercitrin)	-0.99	2.86e-07	SOT15(31777_c1_g1)	Apigenin-8-C-Glucoside (Vitexin)*	-0.86	0.00268
CYP75B1(28055_c2_g1)	Phloretin-2'-O-glucoside (Phlorizin)	-0.99	1.24e-07	SOT15(31777_c1_g1)	Apigenin-6-C-glucoside (Isovitexin)*	-0.89	0.00129
CYP75B1(28055_c2_g1)	Naringenin (5,7,4'-Trihydroxyflavanone)	-1	1.98e-08	SOT15(31777_c1_g1)	Genistein	-0.89	0.00113
CYP75B1(28055_c2_g1)	Quercetin	-1	4.61e-09	SOT15(31777_c1_g1)	Apigenin-7-O-glucoside(Cosmosiin)	-0.92	0.000503
CYP81E(27090_c3_g2)	Luteolin-7-O-neohesperidoside (Lonicerin)	0.94	0.000209	SOT15(31777_c1_g1)	Naringenin-7-O-Neohesperidoside(Naringin)	-0.93	0.000264
CYP81E(27090_c3_g2)	Quercetin	0.88	0.00153	SOT15(31777_c1_g1)	Quercetin-3-O-sambubioside	-0.94	0.000202
CYP81E(27090_c3_g2)	Naringenin (5,7,4'-Trihydroxyflavanone)	0.88	0.00166	SOT15(31777_c1_g1)	Naringenin chalcone; 2',4,4',6'-Tetrahydroxychalcone	-0.96	4.4e-05
CYP81E(27090_c3_g2)	Quercetin-3-O-rhamnoside(Quercitrin)	0.88	0.00175	SOT15(31777_c1_g1)	Cyanidin-3-O-Rutinoside (Keracyanin)	-0.98	2.02e-06
CYP81E(27090_c3_g2)	Naringenin-7-O-glucoside (Prunin)	0.87	0.00219	SOT15(31777_c1_g1)	Hesperetin-7-O-neohesperidoside(Neohesperidin)	-0.98	1.9e-06
CYP81E(27090_c3_g2)	Phloretin-2'-O-glucoside (Phlorizin)	0.85	0.00367	SOT15(31777_c1_g1)	Quercetin-3-O-rutinoside (Rutin)	-0.99	1.2e-06
CYP81E(27090_c3_g2)	Peonidin-3-O-glucoside	0.81	0.00861	UGT94E5(30808_c1_g2)	Tricetin (5,7,3',4',5'-Pentahydroxyflavone)	0.99	1.36e-07
CYP81E(27090_c3_g2)	Epiafzelechin	-0.84	0.00445	UGT94E5(30808_c1_g2)	3,4,2',4',6'-Pentahydroxychalcone-4'-O-glucoside	0.98	3.32e-06
CYP81E(27090_c3_g2)	Kaempferol (3,5,7,4'-Tetrahydroxyflavone)	-0.86	0.00291	UGT94E5(30808_c1_g2)	Pinobanksin	0.9	0.0011
CYP81E(27090_c3_g2)	Leucocyanidin	-0.87	0.00259	UGT94E5(30808_c1_g2)	Quercetin-3-O-sophoroside (Baimaside)	-0.8	0.009
CYP81E(27090_c3_g2)	6''-O-Malonylgenistin	-0.87	0.00218	UGT94E5(30808_c1_g2)	Taxifolin(Dihydroquercetin)	-0.81	0.00848
CYP81E(27090_c3_g2)	Catechin*	-0.88	0.00184	UGT94E5(30808_c1_g2)	Apigenin-7-O-glucoside(Cosmosiin)	-0.88	0.00173
CYP81E(27090_c3_g2)	Afzelechin (3,5,7,4'-Tetrahydroxyflavan)	-0.88	0.00157	UGT94E5(30808_c1_g2)	Naringenin-7-O-Neohesperidoside(Naringin)	-0.91	0.000675
CYP81E(27090_c3_g2)	Kaempferol-3-O-glucoside (Astragalin)	-0.92	0.000489	UGT94E5(30808_c1_g2)	Quercetin-3-O-sambubioside	-0.91	0.000545
CYP81E(27090_c3_g2)	Epigallocatechin	-0.93	0.000226	UGT94E5(30808_c1_g2)	Genistein	-0.92	0.000504
CYP93A1(23882_c0_g2)	Hesperetin-7-O-neohesperidoside(Neohesperidin)	0.98	1.51e-06	UGT94E5(30808_c1_g2)	Apigenin-8-C-Glucoside (Vitexin)*	-0.93	0.000321
CYP93A1(23882_c0_g2)	Naringenin chalcone; 2',4,4',6'-Tetrahydroxychalcone	0.98	4.68e-06	UGT94E5(30808_c1_g2)	Apigenin-6-C-glucoside (Isovitexin)*	-0.93	0.000298
CYP93A1(23882_c0_g2)	Quercetin-3-O-rutinoside (Rutin)	0.98	5.41e-06	UGT94E5(30808_c1_g2)	Naringenin chalcone; 2',4,4',6'-Tetrahydroxychalcone	-0.96	5.2e-05
CYP93A1(23882_c0_g2)	Cyanidin-3-O-Rutinoside (Keracyanin)	0.98	6e-06	UGT94E5(30808_c1_g2)	Quercetin-3-O-rutinoside (Rutin)	-0.99	7.21e-07
CYP93A1(23882_c0_g2)	Quercetin-3-O-sambubioside	0.97	1.16e-05	UGT94E5(30808_c1_g2)	Hesperetin-7-O-neohesperidoside(Neohesperidin)	-0.99	1.98e-07
CYP93A1(23882_c0_g2)	Naringenin-7-O-Neohesperidoside(Naringin)	0.97	1.35e-05	UGT94E5(30808_c1_g2)	Cyanidin-3-O-Rutinoside (Keracyanin)	-1	2.34e-08
CYP93A1(23882_c0_g2)	Apigenin-7-O-glucoside(Cosmosiin)	0.95	9.58e-05	VR(30713_c1_g2)	Naringenin-7-O-glucoside (Prunin)	1	5.72e-10
CYP93A1(23882_c0_g2)	Quercetin-3-O-sophoroside (Baimaside)	0.92	0.000527	VR(23461_c0_g1)	Quercetin-3-O-sophoroside (Baimaside)	0.99	5.64e-07
CYP93A1(23882_c0_g2)	Genistein	0.9	0.001	VR(23461_c0_g1)	Phloretin-2'-O-glucoside (Phlorizin)	0.99	6.31e-07
CYP93A1(23882_c0_g2)	Peonidin-3-O-glucoside	0.88	0.00196	VR(23461_c0_g1)	Peonidin-3-O-glucoside	0.98	2.48e-06
CYP93A1(23882_c0_g2)	Phloretin-2'-O-glucoside (Phlorizin)	0.86	0.00312	VR(23461_c0_g1)	Naringenin (5,7,4'-Trihydroxyflavanone)	0.98	2.83e-06
CYP93A1(23882_c0_g2)	Apigenin-8-C-Glucoside (Vitexin)*	0.83	0.00544	VR(23461_c0_g1)	Quercetin	0.98	4.28e-06
CYP93A1(23882_c0_g2)	Apigenin-6-C-glucoside (Isovitexin)*	0.83	0.00616	VR(23461_c0_g1)	Quercetin-3-O-rhamnoside(Quercitrin)	0.98	5.92e-06
CYP93A1(23882_c0_g2)	Naringenin (5,7,4'-Trihydroxyflavanone)	0.81	0.0084	VR(23461_c0_g1)	Naringenin-7-O-Neohesperidoside(Naringin)	0.95	7.51e-05
CYP93A1(23882_c0_g2)	Quercetin	0.81	0.00847	VR(23461_c0_g1)	Apigenin-7-O-glucoside(Cosmosiin)	0.95	8.56e-05
CYP93A1(23882_c0_g2)	3,4,2',4',6'-Pentahydroxychalcone-4'-O-glucoside	-0.91	0.00072	VR(23461_c0_g1)	Quercetin-3-O-sambubioside	0.95	0.000107
CYP93A1(23882_c0_g2)	Pinobanksin	-0.95	7.83e-05	VR(30713_c1_g2)	Cyanidin-3-O-(2''-O-xylosyl)glucoside-5-O-glucoside	0.95	0.000107
CYP93A1(23882_c0_g2)	Tricetin (5,7,3',4',5'-Pentahydroxyflavone)	-0.95	7.79e-05	VR(30713_c1_g1)	Kaempferol-3-O-rutinoside(Nicotiflorin)	0.94	0.000183
DFR3(30430_c0_g1)	Afzelechin (3,5,7,4'-Tetrahydroxyflavan)	0.95	8.42e-05	VR(30713_c1_g2)	Cyanidin-3,5-O-diglucoside (Cyanin)	0.93	0.000243
DFR1(22091_c0_g2)	Kaempferol (3,5,7,4'-Tetrahydroxyflavone)	0.95	0.000113	VR(30713_c1_g2)	Myricetin	0.91	0.000698
DFR1(22091_c0_g2)	Leucocyanidin	0.95	0.000114	VR(30713_c1_g2)	Luteolin-7-O-neohesperidoside (Lonicerin)	0.91	0.000786
DFR3(30430_c0_g1)	Kaempferol (3,5,7,4'-Tetrahydroxyflavone)	0.94	0.000198	VR(30713_c1_g2)	Dihydromyricetin (Ampelopsin)	0.89	0.0013
DFR3(30430_c0_g1)	Epigallocatechin	0.94	0.000215	VR(30713_c1_g1)	Cyanidin-3-O-glucoside (Kuromanin)	0.89	0.00133
DFR3(30430_c0_g1)	Catechin*	0.93	0.000236	VR(30713_c1_g1)	3,4,2',4',6'-Pentahydroxychalcone-4'-O-glucoside	0.89	0.00142
DFR3(30430_c0_g1)	Kaempferol-3-O-glucoside (Astragalin)	0.93	0.000266	VR(23461_c0_g1)	Naringenin chalcone; 2',4,4',6'-Tetrahydroxychalcone	0.88	0.00179
DFR3(30430_c0_g1)	Leucocyanidin	0.93	0.00033	VR(23461_c0_g1)	Luteolin-7-O-neohesperidoside (Lonicerin)	0.87	0.00236
DFR2(27841_c2_g1)	Kaempferol (3,5,7,4'-Tetrahydroxyflavone)	0.91	0.000553	VR(30713_c1_g1)	Dihydromyricetin (Ampelopsin)	0.85	0.00379
DFR1(22091_c0_g2)	Afzelechin (3,5,7,4'-Tetrahydroxyflavan)	0.91	0.000565	VR(30713_c1_g2)	Cyanidin-3-O-glucoside (Kuromanin)	0.84	0.0042
DFR2(27841_c2_g1)	Leucocyanidin	0.91	0.000636	VR(30713_c1_g1)	Myricetin	0.83	0.00594
DFR1(22091_c0_g2)	Kaempferol-3-O-glucoside (Astragalin)	0.91	0.0007	VR(23461_c0_g1)	Hesperetin-7-O-neohesperidoside(Neohesperidin)	0.82	0.00646
DFR1(22091_c0_g2)	Epiafzelechin	0.9	0.00103	VR(30713_c1_g1)	Tricetin (5,7,3',4',5'-Pentahydroxyflavone)	0.81	0.00758
DFR2(27841_c2_g1)	Epiafzelechin	0.89	0.00122	VR(23461_c0_g1)	Quercetin-3-O-rutinoside (Rutin)	0.81	0.00793
DFR2(27841_c2_g1)	Afzelechin (3,5,7,4'-Tetrahydroxyflavan)	0.88	0.0018	VR(23461_c0_g1)	6''-O-Malonylgenistin	-0.87	0.00242
DFR1(22091_c0_g2)	Catechin*	0.88	0.00182	VR(30713_c1_g2)	Epigallocatechin	-0.89	0.00121
DFR2(27841_c2_g1)	Kaempferol-3-O-glucoside (Astragalin)	0.88	0.0019	VR(30713_c1_g2)	Epiafzelechin	-0.9	0.000905
DFR2(27841_c2_g1)	Catechin*	0.84	0.00422	VR(23461_c0_g1)	Epigallocatechin	-0.92	0.000408
DFR2(27841_c2_g1)	Taxifolin(Dihydroquercetin)	0.82	0.00626	VR(30713_c1_g1)	Apigenin-8-C-Glucoside (Vitexin)*	-0.92	0.000363
DFR3(30430_c0_g1)	Phloretin-2'-O-glucoside (Phlorizin)	-0.81	0.00823	VR(30713_c1_g1)	Apigenin-6-C-glucoside (Isovitexin)*	-0.94	0.000151
DFR3(30430_c0_g1)	Peonidin-3-O-glucoside	-0.81	0.00763	VR(23461_c0_g1)	Pinobanksin	-0.94	0.000142
DFR3(30430_c0_g1)	Cyanidin-3-O-(2''-O-xylosyl)glucoside-5-O-glucoside	-0.82	0.00701	VR(30713_c1_g1)	Taxifolin(Dihydroquercetin)	-0.97	2.16e-05
DFR3(30430_c0_g1)	Naringenin (5,7,4'-Trihydroxyflavanone)	-0.85	0.0039	VR(30713_c1_g2)	Catechin*	-0.97	9.99e-06
DFR3(30430_c0_g1)	Quercetin-3-O-rhamnoside(Quercitrin)	-0.86	0.00326	VR(30713_c1_g2)	Kaempferol-3-O-glucoside (Astragalin)	-0.99	8.17e-07
DFR3(30430_c0_g1)	Quercetin	-0.86	0.00324	VR(30713_c1_g2)	Afzelechin (3,5,7,4'-Tetrahydroxyflavan)	-0.99	7.49e-07
DFR1(22091_c0_g2)	Kaempferol-3-O-rutinoside(Nicotiflorin)	-0.89	0.00113	VR(30713_c1_g2)	Leucocyanidin	-1	1.48e-08
DFR2(27841_c2_g1)	Naringenin-7-O-glucoside (Prunin)	-0.93	0.000334	VR(30713_c1_g2)	Kaempferol (3,5,7,4'-Tetrahydroxyflavone)	-1	6.2e-09
