# Supplementary material for: Metabolome and transcriptome integration reveals insights into petals coloration mechanism of three species in Sect. Chrysantha chang
Source: PeerJ. 2024 Apr 19;12:e17275. doi: 10.7717/peerj.17275 (PMC11034495; doi:10.7717/peerj.17275)
Supplement: Supplemental Information 13 [file peerj-12-17275-s013.xlsx]

## Sheet: Sheet1
Table S12 The correlation analysis between the key structural genes and TFs.
Gene	TFs	TFs ID	PCC	P-Value	Gene	TFs	TFs ID	PCC	P-Value
CcFLS	CcMYB22	TRINITY_DN25744_c1_g3	1	6.18e-10	CcDFR1	CcAP2 6	TRINITY_DN31435_c4_g1	-0.96	3.82e-05
CcFLS	CcMYB23	TRINITY_DN25259_c1_g3	0.95	7.18e-05	CcDFR1	CcAP2 11	TRINITY_DN24795_c4_g1	-0.99	1.89e-07
CcFLS	CcMYB33	TRINITY_DN22125_c2_g2	0.97	1.88e-05	CcDFR2	CcMYB18	TRINITY_DN26386_c2_g3	0.93	0.000324
CcFLS	CcHD-ZIP1	TRINITY_DN31603_c0_g3	0.91	0.000605	CcDFR2	CcMYB25	TRINITY_DN24905_c4_g3	0.93	0.000312
CcFLS	CcHD-ZIP5	TRINITY_DN30121_c3_g1	0.91	0.000565	CcDFR2	CcMYB30	TRINITY_DN23906_c0_g2	0.94	0.000131
CcFLS	CcHD-ZIP9	TRINITY_DN28329_c3_g1	0.99	5.41e-08	CcDFR2	CcEREBP3	TRINITY_DN30454_c1_g1	0.97	2.33e-05
CcFLS	CcHD-ZIP16	TRINITY_DN24870_c0_g1	0.97	1.01e-05	CcDFR2	CcEREBP4	TRINITY_DN27895_c2_g1	0.95	8.8e-05
CcFLS	CcHD-ZIP17	TRINITY_DN23980_c3_g1	0.98	7.19e-06	CcDFR2	CcMADS-box7	TRINITY_DN26446_c0_g1	0.98	3.96e-06
CcFLS	CcEREBP11	TRINITY_DN23014_c1_g2	0.91	0.000752	CcDFR2	CcMYB2	TRINITY_DN8054_c0_g1	-0.94	0.00015
CcFLS	CcMADS-box9	TRINITY_DN15713_c0_g1	0.95	6.93e-05	CcDFR2	CcMYB6	TRINITY_DN31451_c0_g2	-0.99	2.19e-07
CcFLS	CcMYB7	TRINITY_DN30196_c2_g1	-0.94	0.000145	CcDFR2	CcMYB17	TRINITY_DN26771_c1_g1	-0.94	0.000179
CcFLS	CcMYB13	TRINITY_DN27802_c3_g1	-0.95	6.56e-05	CcDFR2	CcMYB38	TRINITY_DN17480_c0_g1	-0.93	0.000314
CcFLS	CcMYB15	TRINITY_DN27567_c0_g1	-0.98	7.57e-06	CcDFR2	CcHD-ZIP7	TRINITY_DN29719_c1_g1	-0.98	3.18e-06
CcFLS	CcHD-ZIP13	TRINITY_DN25400_c0_g2	-0.94	0.000138	CcDFR2	CcHD-ZIP10	TRINITY_DN28010_c0_g2	-0.98	2.97e-06
CcFLS	CcHD-ZIP19	TRINITY_DN23282_c3_g5	-0.98	3.73e-06	CcDFR2	CcAP2 6	TRINITY_DN31435_c4_g1	-0.99	1.25e-06
CcFLS	CcEREBP2	TRINITY_DN31997_c3_g1	-0.91	0.0007	CcDFR2	CcAP2 8	TRINITY_DN24925_c0_g1	-0.98	3e-06
CcFLS	CcEREBP12	TRINITY_DN21580_c0_g1	-0.98	2.81e-06	CcDFR2	CcAP2 11	TRINITY_DN24795_c4_g1	-0.99	9.44e-07
CcFLS	CcWRKY1	TRINITY_DN31022_c3_g4	-0.98	6.31e-06	CcDFR2	CcEREBP5	TRINITY_DN27666_c1_g1	-0.99	9.18e-07
CcFLS	CcMADS-box6	TRINITY_DN27016_c3_g1	-0.96	4.4e-05	CcDFR2	CcEREBP13	TRINITY_DN18916_c0_g2	-0.94	0.000136
CcFLS	CcMADS-box8	TRINITY_DN24413_c4_g1	-0.94	0.000203	CcDFR2	CcMADS-box5	TRINITY_DN27283_c0_g1	-0.99	3.07e-07
CcCHI	CcMYB28	TRINITY_DN24527_c4_g1	0.99	1.4e-07	CcDFR3	CcMYB10	TRINITY_DN28475_c3_g1	0.92	0.000376
CcCHI	CcHD-ZIP1	TRINITY_DN31603_c0_g3	0.92	0.000433	CcDFR3	CcMYB36	TRINITY_DN19404_c0_g1	0.94	0.000214
CcCHI	CcAP2 3	TRINITY_DN23415_c2_g2	0.91	0.000652	CcDFR3	CcHD-ZIP3	TRINITY_DN31093_c0_g3	0.93	0.00031
CcCHI	CcEREBP9	TRINITY_DN25541_c2_g1	0.91	0.000688	CcDFR3	CcHD-ZIP11	TRINITY_DN26775_c5_g1	0.92	0.000403
CcCHI	CcMYB3	TRINITY_DN31957_c1_g3	-0.93	0.000243	CcDFR3	CcAP2 1	TRINITY_DN26452_c0_g1	0.93	0.00022
CcCHI	CcMYB10	TRINITY_DN28475_c3_g1	-0.93	0.000266	CcDFR3	CcAP2 2	TRINITY_DN23415_c2_g5	0.94	0.000139
CcCHI	CcMYB21	TRINITY_DN25744_c1_g4	-0.93	0.000326	CcDFR3	CcWRKY2	TRINITY_DN31022_c3_g1	0.96	2.85e-05
CcCHI	CcHD-ZIP11	TRINITY_DN26775_c5_g1	-0.91	0.00069	CcDFR3	CcWRKY9	TRINITY_DN25722_c4_g1	0.95	0.000118
CcCHI	CcHD-ZIP13	TRINITY_DN25400_c0_g2	-0.93	0.000253	CcDFR3	CcWRKY10	TRINITY_DN25328_c1_g1	0.97	2.07e-05
CcCHI	CcAP2 10	TRINITY_DN24795_c4_g2	-0.95	8.33e-05	CcDFR3	CcEREBP9	TRINITY_DN25541_c2_g1	-0.95	0.000111
CcCHI	CcWRKY8	TRINITY_DN30212_c0_g1	-0.93	0.000329	CcDFR3	CcEREBP13	TRINITY_DN18916_c0_g2	-0.9	0.000938
CcCHI	CcMADS-box4	TRINITY_DN27553_c2_g2	-0.96	5.2e-05	CcDFR3	CcMADS-box1	TRINITY_DN31940_c2_g2	-0.92	0.00043
CcCHI	CcMADS-box6	TRINITY_DN27016_c3_g1	-0.96	2.77e-05	CcCYP75B1	CcMYB3	TRINITY_DN31957_c1_g3	0.95	8.53e-05
CcDFR1	CcMYB30	TRINITY_DN23906_c0_g2	0.91	0.000581	CcCYP75B1	CcMYB10	TRINITY_DN28475_c3_g1	0.98	4.39e-06
CcDFR1	CcMYB18	TRINITY_DN26386_c2_g3	0.9	0.000795	CcCYP75B1	CcMYB21	TRINITY_DN25744_c1_g4	0.95	8.25e-05
CcDFR1	CcEREBP3	TRINITY_DN30454_c1_g1	0.97	1.27e-05	CcCYP75B1	CcHD-ZIP11	TRINITY_DN26775_c5_g1	0.94	0.000164
CcDFR1	CcEREBP4	TRINITY_DN27895_c2_g1	0.92	0.00053	CcCYP75B1	CcAP2 2	TRINITY_DN23415_c2_g5	0.93	0.000314
CcDFR1	CcMADS-box7	TRINITY_DN26446_c0_g1	0.97	1.46e-05	CcCYP75B1	CcAP2 10	TRINITY_DN24795_c4_g2	0.98	1.69e-06
CcDFR1	CcMYB6	TRINITY_DN31451_c0_g2	-0.98	2.85e-06	CcCYP75B1	CcWRKY8	TRINITY_DN30212_c0_g1	0.97	1.23e-05
CcDFR1	CcMYB2	TRINITY_DN8054_c0_g1	-0.91	0.000545	CcCYP75B1	CcWRKY9	TRINITY_DN25722_c4_g1	0.94	0.000123
CcDFR1	CcMYB17	TRINITY_DN26771_c1_g1	-0.97	1.75e-05	CcCYP75B1	CcMADS-box3	TRINITY_DN28278_c1_g1	0.92	0.000424
CcDFR1	CcWRKY7	TRINITY_DN23535_c1_g1	-0.93	0.000345	CcCYP75B1	CcMADS-box4	TRINITY_DN27553_c2_g2	0.92	0.000424
CcDFR1	CcMADS-box5	TRINITY_DN27283_c0_g1	-0.98	3.11e-06	CcCYP75B1	CcMYB28	TRINITY_DN24527_c4_g1	-0.97	1.34e-05
CcDFR1	CcHD-ZIP7	TRINITY_DN29719_c1_g1	-0.99	9.18e-07	CcCYP75B1	CcMYB35	TRINITY_DN20870_c0_g2	-0.94	0.000145
CcDFR1	CcHD-ZIP10	TRINITY_DN28010_c0_g2	-0.96	2.97e-05	CcCYP75B1	CcAP2 3	TRINITY_DN23415_c2_g2	-0.95	9.78e-05
CcDFR1	CcEREBP5	TRINITY_DN27666_c1_g1	-0.99	8.86e-08	CcCYP75B1	CcEREBP9	TRINITY_DN25541_c2_g1	-0.97	1.76e-05
CcDFR1	CcEREBP13	TRINITY_DN18916_c0_g2	-0.97	2.01e-05	CcCYP75B1	CcMADS-box1	TRINITY_DN31940_c2_g2	-0.93	0.000342
CcDFR1	CcAP2 8	TRINITY_DN24925_c0_g1	-0.99	4.58e-08
