# Supplementary material for: Metabolome and transcriptome integration reveals insights into petals coloration mechanism of three species in Sect. Chrysantha chang
Source: PeerJ. 2024 Apr 19;12:e17275. doi: 10.7717/peerj.17275 (PMC11034495; doi:10.7717/peerj.17275)
Supplement: Supplemental Information 14 [file peerj-12-17275-s014.xlsx]

## Sheet: Sheet1
Table S13 Raw data for qRT-PCR.
Sample Name	Gene Name	Cq	Cq mean	△Cq m-△Cq m	mean	△△CT	2△△CT	mean	Sample Name	Gene Name	Cq	Cq mean	△Cq m-△Cq m	mean	△△CT	2△△CT	mean	Sample Name	Gene Name	Cq	Cq mean	△Cq m-△Cq m	mean	△△CT	2△△CT	mean	Sample Name	Gene Name	Cq	Cq mean	△Cq m-△Cq m	mean	△△CT	2△△CT	mean	Sample Name	Gene Name	Cq	Cq mean	△Cq m-△Cq m	mean	△△CT	2△△CT	mean	Sample Name	Gene Name	Cq	Cq mean	△Cq m-△Cq m
CZ1	GAPDH	22.66	22.6433						CZ2	GAPDH	20.29	20.35						CZ3	GAPDH	20.6	20.6833						XB1	GAPDH	22.83	22.8633						XB2	GAPDH	23.63	23.5933						XB3	GAPDH	23.33	23.1467
CZ1	GAPDH	22.68							CZ2	GAPDH	20.31							CZ3	GAPDH	20.75							XB1	GAPDH	22.91							XB2	GAPDH	23.46							XB3	GAPDH	23.27
CZ1	GAPDH	22.59							CZ2	GAPDH	20.45							CZ3	GAPDH	20.7							XB1	GAPDH	22.85							XB2	GAPDH	23.69							XB3	GAPDH	22.84
CZ1	1	24.6	24.62	1.95667	1.97667	0.02	1.01396	1.00107	CZ2	1	22.36	22.42	2.01	2.07	-0.0333333	0.97716	0.937998	CZ3	1	22.86	22.9033	2.17667	2.22	-0.2	0.870551	0.845253	XB1	1	25.63	25.6667	2.76667	2.80333	-0.79	0.578344	0.566352	XB2	1	26.28	26.26	2.68667	2.66667	-0.71	0.61132	0.619894	XB3	1	26.35	26.38	3.20333
CZ1	1	24.55		1.90667		0.07	1.04972		CZ2	1	22.41		2.06		-0.0833333	0.943874		CZ3	1	22.97		2.28667		-0.31	0.806642		XB1	1	25.52		2.65667		-0.68	0.624165		XB2	1	26.26		2.66667		-0.69	0.619854		XB3	1	26.44		3.29333
CZ1	1	24.71		2.06667		-0.09	0.939523		CZ2	1	22.49		2.14		-0.163333	0.89296		CZ3	1	22.88		2.19667		-0.22	0.858565		XB1	1	25.85		2.98667		-1.01	0.496546		XB2	1	26.24		2.64667		-0.67	0.628507		XB3	1	26.35		3.20333
CZ1	2	25.12	25.12	2.47667	2.47667	0	1	1.00014	CZ2	2	22.94	23.0233	2.59	2.67333	-0.113333	0.92445	0.87333	CZ3	2	23.29	23.3133	2.60667	2.63	-0.13	0.913831	0.899519	XB1	2	22.98	22.9433	0.116667	0.08	2.36	5.1337	5.26928	XB2	2	23.22	23.2267	-0.373333	-0.366667	2.85	7.21	7.20619	XB3	2	22.81	22.8433	-0.336667
CZ1	2	25.09		2.44667		0.03	1.02101		CZ2	2	23.08		2.73		-0.253333	0.838956		CZ3	2	23.28		2.59667		-0.12	0.920188		XB1	2	22.98		0.116667		2.36	5.1337		XB2	2	23.39		-0.203333		2.68	6.40856		XB3	2	22.98		-0.166667
CZ1	2	25.15		2.50667		-0.03	0.97942		CZ2	2	23.05		2.7		-0.223333	0.856584		CZ3	2	23.37		2.68667		-0.21	0.864537		XB1	2	22.87		0.00666667		2.47	5.54044		XB2	2	23.07		-0.523333		3	8		XB3	2	22.74		-0.406667
CZ1	3	26.08	26.1233	3.43667	3.48	0.0433333	1.03049	1.00165	CZ2	3	23.96	23.9133	3.61	3.56333	-0.13	0.913831	0.944181	CZ3	3	24.54	24.3367	3.85667	3.65333	-0.376667	0.770215	0.893114	XB1	3	22.68	22.5767	-0.183333	-0.286667	3.66333	12.6699	13.6375	XB2	3	23.58	23.4467	-0.0133333	-0.146667	3.49333	11.2615	12.3812	XB3	3	22.85	22.6133	-0.296667
CZ1	3	26.05		3.40667		0.0733333	1.05214		CZ2	3	23.91		3.56		-0.08	0.946058		CZ3	3	24.35		3.66667		-0.186667	0.878633		XB1	3	22.46		-0.403333		3.88333	14.7571		XB2	3	23.42		-0.173333		3.65333	12.5824		XB3	3	22.03		-1.11667
CZ1	3	26.24		3.59667		-0.116667	0.922316		CZ2	3	23.87		3.52		-0.04	0.972655		CZ3	3	24.12		3.43667		0.0433333	1.03049		XB1	3	22.59		-0.273333		3.75333	13.4855		XB2	3	23.34		-0.253333		3.73333	13.2998		XB3	3	22.96		-0.186667
CZ1	4	29.64	29.7	6.99667	7.05667	0.06	1.04247	1.00083	CZ2	4	27.46	27.55	7.11	7.2	-0.0533333	0.963707	0.906347	CZ3	4	27.98	27.8	7.29667	7.11667	-0.24	0.846745	0.964248	XB1	4	27.18	27.32	4.31667	4.45667	2.74	6.6807	6.07886	XB2	4	28.28	28.07	4.68667	4.47667	2.37	5.16941	6.01037	XB3	4	27.86	27.7167	4.71333
CZ1	4	29.78		7.13667		-0.08	0.946058		CZ2	4	27.58		7.23		-0.173333	0.886791		CZ3	4	27.8		7.11667		-0.06	0.959264		XB1	4	27.43		4.56667		2.49	5.61778		XB2	4	27.96		4.36667		2.69	6.45313		XB3	4	27.75		4.60333
CZ1	4	29.68		7.03667		0.02	1.01396		CZ2	4	27.61		7.26		-0.203333	0.868541		CZ3	4	27.62		6.93667		0.12	1.08673		XB1	4	27.35		4.48667		2.57	5.93809		XB2	4	27.97		4.37667		2.68	6.40856		XB3	4	27.54		4.39333
CZ1	5	31.89	31.7167	9.24667	9.07333	-0.173333	0.886791	1.00642	CZ2	5	28.89	28.9733	8.54	8.62333	0.533333	1.44727	1.36745	CZ3	5	29.79	29.89	9.10667	9.20667	-0.0333333	0.97716	0.912958	XB1	5	27.18	27.2167	4.31667	4.35333	4.75667	27.0333	26.3968	XB2	5	27.94	28.0367	4.34667	4.44333	4.72667	26.477	24.8107	XB3	5	27.65	27.6033	4.50333
CZ1	5	31.5		8.85667		0.216667	1.16205		CZ2	5	28.98		8.63		0.443333	1.35974		CZ3	5	29.97		9.28667		-0.213333	0.862542		XB1	5	27.14		4.27667		4.79667	27.7933		XB2	5	28.16		4.56667		4.50667	22.7322		XB3	5	27.37		4.22333
CZ1	5	31.76		9.11667		-0.0433333	0.97041		CZ2	5	29.05		8.7		0.373333	1.29534		CZ3	5	29.91		9.22667		-0.153333	0.899171		XB1	5	27.33		4.46667		4.60667	24.3638		XB2	5	28.01		4.41667		4.65667	25.223		XB3	5	27.79		4.64333
CZ1	6	22.59	22.6433	-0.0533333	-1.18424e-15	0.0533333	1.03766	1.0006	CZ2	6	20.28	20.17	-0.07	-0.18	0.07	1.04972	1.13474	CZ3	6	20.21	20.2267	-0.473333	-0.456667	0.473333	1.38831	1.37286	XB1	6	20.04	20.07	-2.82333	-2.79333	2.82333	7.07796	6.93769	XB2	6	20.62	20.6167	-2.97333	-2.97667	2.97333	7.85349	7.877	XB3	6	20.34	20.3333	-2.80667
CZ1	6	22.63		-0.0133333		0.0133333	1.00928		CZ2	6	20.08		-0.27		0.27	1.20581		CZ3	6	20.19		-0.493333		0.493333	1.40769		XB1	6	20.15		-2.71333		2.71333	6.55835		XB2	6	20.68		-2.91333		2.91333	7.53357		XB3	6	20.27		-2.87667
CZ1	6	22.71		0.0666667		-0.0666667	0.954842		CZ2	6	20.15		-0.2		0.2	1.1487		CZ3	6	20.28		-0.403333		0.403333	1.32256		XB1	6	20.02		-2.84333		2.84333	7.17676		XB2	6	20.55		-3.04333		3.04333	8.24394		XB3	6	20.39		-2.75667
CZ1	7	28.2	28.1133	5.55667	5.47	-0.0866667	0.941696	1.00413	CZ2	7	25.73	25.8033	5.38	5.45333	0.09	1.06437	1.01329	CZ3	7	26.11	26.1133	5.42667	5.43	0.0433333	1.03049	1.02881	XB1	7	30.82	30.8333	7.95667	7.97	-2.48667	0.178418	0.177257	XB2	7	31.62	31.6333	8.02667	8.04	-2.55667	0.169968	0.168862	XB3	7	30.96	30.9933	7.81333
CZ1	7	27.93		5.28667		0.183333	1.1355		CZ2	7	25.92		5.57		-0.1	0.933033		CZ3	7	26.18		5.49667		-0.0266667	0.981686		XB1	7	30.97		8.10667		-2.63667	0.160799		XB2	7	31.77		8.17667		-2.70667	0.153184		XB3	7	31.04		7.89333
CZ1	7	28.21		5.56667		-0.0966667	0.935191		CZ2	7	25.76		5.41		0.06	1.04247		CZ3	7	26.05		5.36667		0.103333	1.07425		XB1	7	30.71		7.84667		-2.37667	0.192554		XB2	7	31.51		7.91667		-2.44667	0.183434		XB3	7	30.98		7.83333
CZ1	8	33.2	33.1833	10.5567	10.54	-0.0166667	0.988514	1.00004	CZ2	8	31.23	31.2633	10.88	10.9133	-0.34	0.790041	0.7721	CZ3	8	31.32	31.3333	10.6367	10.65	-0.0966667	0.935191	0.926623	XB1	8	32.01	32.1433	9.14667	9.28	1.39333	2.62685	2.4025	XB2	8	33.01	33.1567	9.41667	9.56333	1.12333	2.1785	1.97671	XB3	8	32.29	32.3033	9.14333
CZ1	8	33.18		10.5367		0.00333333	1.00231		CZ2	8	31.28		10.93		-0.39	0.76313		CZ3	8	31.35		10.6667		-0.126667	0.915945		XB1	8	32.13		9.26667		1.27333	2.41719		XB2	8	33.12		9.52667		1.01333	2.01857		XB3	8	32.5		9.35333
CZ1	8	33.17		10.5267		0.0133333	1.00928		CZ2	8	31.28		10.93		-0.39	0.76313		CZ3	8	31.33		10.6467		-0.106667	0.928731		XB1	8	32.29		9.42667		1.11333	2.16345		XB2	8	33.34		9.74667		0.793333	1.73307		XB3	8	32.12		8.97333
CZ1	GAPDH	22.4	22.4533						CZ2	GAPDH	20.21	20.2567						CZ3	GAPDH	20.53	20.61						XB1	GAPDH	23.33	23.13						XB2	GAPDH	23.75	23.685						XB3	GAPDH	23.14	23.24
CZ1	GAPDH	22.51							CZ2	GAPDH	20.29							CZ3	GAPDH	20.69							XB1	GAPDH	22.95							XB2	GAPDH	23.62							XB3	GAPDH	23.34
CZ1	GAPDH	22.45							CZ2	GAPDH	20.27							CZ3	GAPDH	-							XB1	GAPDH	23.11							XB2	GAPDH	-							XB3	GAPDH	-
CZ1	9	33.81	33.79	11.3567	11.3367	-0.02	0.986233	1.00045	CZ2	9	31.36	31.36	11.1033	11.1033	0.233333	1.17555	1.17562	CZ3	9	31.88	31.9467	11.27	11.3367	0.0666667	1.04729	1.00181	XB1	9	32.62	32.5867	9.49	9.45667	1.84667	3.59668	3.68273	XB2	9	33.33	33.3133	9.645	9.62833	1.69167	3.2303	3.26901	XB3	9	33.01	33.0367	9.77
CZ1	9	33.83		11.3767		-0.04	0.972655		CZ2	9	31.34		11.0833		0.253333	1.19196		CZ3	9	32.07		11.46		-0.123333	0.918064		XB1	9	32.52		9.39		1.94667	3.85483		XB2	9	33.35		9.665		1.67167	3.18582		XB3	9	33.02		9.78
CZ1	9	33.73		11.2767		0.06	1.04247		CZ2	9	31.38		11.1233		0.213333	1.15936		CZ3	9	31.89		11.28		0.0566667	1.04006		XB1	9	32.62		9.49		1.84667	3.59668		XB2	9	33.26		9.575		1.76167	3.3909		XB3	9	33.08		9.84
CZ1	10	31.29	31.05	8.83667	8.59667	-0.24	0.846745	1.00815	CZ2	10	29.02	28.9967	8.76333	8.74	-0.166667	0.890899	0.906306	CZ3	10	28.86	28.88	8.25	8.27	0.346667	1.27162	1.25467	XB1	10	34.92	34.9433	11.79	11.8133	-3.19333	0.109323	0.10758	XB2	10	34.65	34.6267	10.965	10.9417	-2.36833	0.193669	0.19719	XB3	10	34.17	34.2367	10.93
CZ1	10	30.84		8.38667		0.21	1.15669		CZ2	10	29.06		8.80333		-0.206667	0.866537		CZ3	10	28.84		8.23		0.366667	1.28937		XB1	10	34.97		11.84		-3.24333	0.105599		XB2	10	34.72		11.035		-2.43833	0.184497		XB3	10	34.22		10.98
CZ1	10	31.02		8.56667		0.03	1.02101		CZ2	10	28.91		8.65333		-0.0566667	0.961483		CZ3	10	28.94		8.33		0.266667	1.20303		XB1	10	34.94		11.81		-3.21333	0.107818		XB2	10	34.51		10.825		-2.22833	0.213405		XB3	10	34.32		11.08
CZ1	11	31.67	31.65	9.21667	9.19667	-0.02	0.986233	1.00166	CZ2	11	29.47	29.5233	9.21333	9.26667	-0.0166667	0.988514	0.953025	CZ3	11	30.74	30.7033	10.13	10.0933	-0.933333	0.523647	0.537476	XB1	11	30.95	30.8333	7.82	7.70333	1.37667	2.59668	2.82088	XB2	11	32.09	32.1067	8.405	8.42167	0.791667	1.73107	1.71125	XB3	11	31.34	31.28	8.1
CZ1	11	31.74		9.28667		-0.09	0.939523		CZ2	11	29.57		9.31333		-0.116667	0.922316		CZ3	11	30.74		10.13		-0.933333	0.523647		XB1	11	30.73		7.6		1.59667	3.02444		XB2	11	32.11		8.425		0.771667	1.70724		XB3	11	31.21		7.97
CZ1	11	31.54		9.08667		0.11	1.07923		CZ2	11	29.53		9.27333		-0.0766667	0.948246		CZ3	11	30.63		10.02		-0.823333	0.565135		XB1	11	30.82		7.69		1.50667	2.84153		XB2	11	32.12		8.435		0.761667	1.69545		XB3	11	31.29		8.05
CZ1	12	30.78	30.67	8.32667	8.21667	-0.11	0.926588	1.00154	CZ2	12	28.48	28.3567	8.22333	8.1	-0.00666667	0.99539	1.08622	CZ3	12	28.66	28.72	8.05	8.11	0.166667	1.12246	1.07748	XB1	12	31.91	31.94	8.78	8.81	-0.563333	0.676737	0.66301	XB2	12	32.21	32.2033	8.525	8.51833	-0.308333	0.807574	0.812374	XB3	12	32.62	32.7333	9.38
CZ1	12	30.59		8.13667		0.08	1.05702		CZ2	12	28.28		8.02333		0.193333	1.1434		CZ3	12	28.71		8.1		0.116667	1.08423		XB1	12	31.99		8.86		-0.643333	0.640232		XB2	12	32.11		8.425		-0.208333	0.865537		XB3	12	32.76		9.52
CZ1	12	30.64		8.18667		0.03	1.02101		CZ2	12	28.31		8.05333		0.163333	1.11987		CZ3	12	28.79		8.18		0.0366667	1.02574		XB1	12	31.92		8.79		-0.573333	0.672062		XB2	12	32.29		8.605		-0.388333	0.764012		XB3	12	32.82		9.58
CZ1	13	32.37	32.3267	9.91667	9.87333	-0.0433333	0.97041	1.00042	CZ2	13	33.16	33.1267	12.9033	12.87	-3.03	0.122428	0.125357	CZ3	13	30.39	30.4233	9.78	9.81333	0.0933333	1.06683	1.05295	XB1	13	29.75	29.8267	6.62	6.69667	3.25333	9.53566	9.05145	XB2	13	30.21	30.17	6.525	6.485	3.34833	10.1847	10.4732	XB3	13	29.37	29.3367	6.13
CZ1	13	32.27		9.81667		0.0566667	1.04006		CZ2	13	33.16		12.9033		-3.03	0.122428		CZ3	13	30.69		10.08		-0.206667	0.866537		XB1	13	29.91		6.78		3.09333	8.53466		XB2	13	30.14		6.455		3.41833	10.6911		XB3	13	29.27		6.03
CZ1	13	32.34		9.88667		-0.0133333	0.990801		CZ2	13	33.06		12.8033		-2.93	0.131215		CZ3	13	30.19		9.58		0.293333	1.22547		XB1	13	29.82		6.69		3.18333	9.08404		XB2	13	30.16		6.475		3.39833	10.5439		XB3	13	29.37		6.13
CZ1	14	27.27	27.3233	27.27	27.3233	-27.27	6.17891e-09	5.95821e-09	CZ2	14	25.26	25.2533	25.26	25.2533	-25.26	2.48876e-08	2.50431e-08	CZ3	14	25.69	25.6733	25.69	25.6733	-25.69	1.84731e-08	1.86884e-08	XB1	14	34.96	34.9033	34.96	34.9033	-34.96	2.99221e-11	3.11338e-11	XB2	14	34.95	34.97	34.95	34.97	-34.95	3.01302e-11	2.97168e-11	XB3	14	34.94	34.92	34.94
CZ1	14	27.39		27.39		-27.39	5.68576e-09		CZ2	14	25.35		25.35		-25.35	2.33824e-08		CZ3	14	25.67		25.67		-25.67	1.8731e-08		XB1	14	34.86		34.86		-34.86	3.20697e-11		XB2	14	34.98		34.98		-34.98	2.95101e-11		XB3	14	34.94		34.94
CZ1	14	27.31		27.31		-27.31	6.00995e-09		CZ2	14	25.15		25.15		-25.15	2.68594e-08		CZ3	14	25.66		25.66		-25.66	1.88612e-08		XB1	14	34.89		34.89		-34.89	3.14097e-11		XB2	14	34.98		34.98		-34.98	2.95101e-11		XB3	14	34.88		34.88
[truncated: 31 more columns]
